# **The Arabidopsis mitochondrial dicarboxylate carrier 2 maintains leaf metabolic homeostasis by uniting malate import and citrate export**

Chun Pong Lee<sup>1</sup>, Marlene Elsässer<sup>2</sup>, Philippe Fuchs<sup>2,3</sup>, Ricarda Fenske<sup>1</sup>, Markus Schwarzländer<sup>2</sup>, A. Harvey Millar<sup>1\*</sup>

<sup>1</sup> ARC Centre of Excellence in Plant Energy Biology, Bayliss Building M316, University of Western Australia, 35 Stirling Highway, Crawley 6009, Western Australia, Australia.

<sup>2</sup> Institute of Plant Biology and Biotechnology, University of Münster, Schlossplatz 8, D-48143 Münster, Germany

<sup>3</sup> Institute of Crop Science and Resource Conservation, Rheinische Friedrich-Wilhelms-Universität Bonn, Friedrich-Ebert-Allee 144, D-53113 Bonn, Germany

\*Corresponding author: [harvey.milllar@uwa.edu.au](mailto:harvey.milllar@uwa.edu.au)

**Keywords:** mitochondria, transport, malate, citrate, TCA cycle

**Author Contributions:** CPL performed most of the experiments in this manuscript and undertook data analysis. ME and PF conducted experiments with Peredox-mCherry lines and carried out data analysis. RF undertook MRM development and analysis. CPL, MS and AHM developed the experimental plan. CPL and AHM wrote the manuscript and all authors revised the manuscript.

## ABSTRACT

Malate is the major substrate for respiratory oxidative phosphorylation in illuminated leaves. In the mitochondria malate is converted to citrate either for replenishing tricarboxylic acid (TCA) cycle with carbon, or to be exported as substrate for cytosolic biosynthetic pathways or for storage in the vacuole. In this study, we show that DIC2 functions as a mitochondrial malate/citrate carrier *in vivo* in *Arabidopsis*. DIC2 knockout (*dic2-1*) results in growth retardation that can only be restored by expressing DIC2 but not its closest homologs DIC1 or DIC3, indicating that their substrate preferences are not identical. Malate uptake by non-energised *dic2-1* mitochondria is reduced but can be restored in fully energised mitochondria by altering fumarate and pyruvate/oxaloacetate transport. A reduced citrate export but an increased citrate accumulation in substrate-fed, energised *dic2-1* mitochondria suggest that DIC2 facilitates the export of citrate from the matrix. Consistent with this, metabolic defects in response to a sudden dark shift or prolonged darkness could be observed in *dic2-1* leaves, including altered malate, citrate and 2-oxoglutarate utilisation. There was no alteration in TCA cycle metabolite pools and NAD redox state at night; however, isotopic glucose tracing reveals a reduction in citrate labelling in *dic2-1* which resulted in a diversion of flux towards glutamine, as well as the removal of excess malate via asparagine and threonine synthesis. Overall, these observations indicate that DIC2 is responsible *in vivo* for mitochondrial malate import and citrate export which coordinate carbon metabolism between the mitochondrial matrix and the other cell compartments.

## SIGNIFICANCE STATEMENT

Mitochondria are pivotal for plant metabolism. One of their central functions is to provide carbon intermediates for the synthesis of critical building blocks, such as amino acids. Malate import and citrate export are two of the most recognised and specialised features of the mitochondrial role in the plant cellular metabolic network, yet the possibility that a single carrier would unite both functions has not been considered. Here, we have demonstrated that DIC2 preferentially fulfils these two functions in *Arabidopsis thaliana* *in vivo*, making it a bifunctional gateway for two major metabolite fluxes into and out of the mitochondrial matrix in the plant cell. Our results highlight the significance of DIC2 in cooperation with other mitochondrial carriers in maintaining metabolic balance even under challenging environmental conditions.

## INTRODUCTION

Malate is a prominent metabolite that occupies a pivotal node in the regulation of plant carbon metabolism. It is the mainstay of leaf respiration and metabolic redox shuttling between organelles (1). Early studies with isolated plant mitochondria demonstrated that exogenous malate can be translocated by an unknown mechanism into the mitochondrial matrix where it is then rapidly oxidized by both mitochondrial malate dehydrogenase (mMDH) and malic enzyme (NAD-ME), generating oxaloacetate (OAA) and pyruvate as products (2, 3). OAA inhibits mitochondrial respiration by direct inhibition of succinate dehydrogenase and due to the fact that the chemical equilibrium of the mMDH reaction highly favours OAA conversion to malate, thereby diverting NADH away from the electron transport chain (ETC) (4, 5). The NAD-ME activity prevents OAA accumulation in mitochondria, and thus allows the continued oxidation of malate produced in concert with phosphoenolpyruvate carboxylase and malate dehydrogenase activities in the cytosol (6-8), even in the absence of glycolysis-derived pyruvate. Both experimental evidence and flux-balance model predictions indicate that TCA cycle-driven respiration is largely inhibited in the light and that mMDH generally operates in the reverse direction to facilitate redox coupling, resulting in net mitochondrial OAA import and malate efflux (9-13). At night, the requirement for exchanging reducing equivalents between mitochondria and chloroplasts via a malate valve (1, 14, 15) is believed to be minimal due the cessation of both photorespiration and photoinhibitory conditions. The mitochondrial NAD-ME activity and its transcript abundance is highest in the dark (16), therefore the synthesis and oxidation of malate is expected to be carried out by both mMDH and NAD-ME to support the synthesis of ATP (17). These metabolic conditions would enable maximal citrate oxidation in the mitochondrial matrix (18, 19), with excess citrate being exported for storage in the vacuole (20). Inhibition in the synthesis of citrate from malate-derived OAA in mitochondria and its export leads to floral sterility in potato plants (21) and a change in nitrogen incorporation into amino acids and metabolism in tomato leaves (22). Defects in controlling mitochondrial malate use cause different phenotypic changes and metabolic remodelling: the absence of mMDH activity in *Arabidopsis* results in a slow growth phenotype and an elevated leaf respiration rate (23), and the loss of NAD-ME in *Arabidopsis* causes a significant diversion of excess malate to amino acid synthesis at night (16). Even though the mitochondrial transport of malate and citrate is clearly at the heart of the remarkable metabolic flexibility of plants, the identity of the transporter(s) that underpin those fluxes *in vivo* has remained inconclusive.

By identifying homologues of yeast and mammalian carriers in *Arabidopsis thaliana*, several possible candidates that may contribute to mitochondrial malate transport in plants were identified (24-26). In contrast to the historical, well-established models that mitochondrial metabolite transporters are discrete and highly specific (27-29), these carriers appeared to lack substrate specificities under *in vitro* conditions – for example, dicarboxylate carrier (DIC) isoforms in proteoliposomes can rapidly exchange sulfate with phosphate, malate, OAA and succinate, with an apparent low exchange activity

in the presence of citrate, 2-oxoglutarate and fumarate (24). Although *in vitro* studies have been instrumental to reveal what transport activities can be mediated by a protein, they have limitations that turn out to be critical in the case of plant mitochondrial organic acid transporters. For instance, they cannot suitably consider the – often unknown and probably highly changeable – relative metabolite pool sizes and fluxes that the transporters face *in vivo*. Reconstitution with a specific orientation of the transporter is not possible in most *in vitro* systems, but critical for substrate specificity and respiratory physiology *in vivo*. Further, the specific local lipid environment and the pronounced electrochemical gradients ( $\Delta\psi$ ,  $\Delta\text{pH}$ ), both of which are likely to be central for inner mitochondrial membrane transport activity and specificity (17), can only be roughly considered. As such, additional information is needed on the function of any transporter candidate within a physiologically more meaningful context. Yet, *in planta* studies of mitochondrial metabolite transporter function that address the question of their *in vivo* function, requiring a systems perspective to consider their integration in the metabolic network, have been lacking.

In this study, we reveal a primary role for DIC2 in malate import and citrate export from Arabidopsis mitochondria. Through a reverse genetic approach in combination with comprehensive *in vitro*, *in organello*, and *in vivo* analyses, we obtained strong evidence that plant mitochondrial malate and citrate exchange as mediated by DIC2 plays a critical role in dynamically coordinating anaplerotic metabolism with assimilatory and catabolic pathways between the mitochondria and other cellular compartments.

## RESULTS

### **DIC2 mutation causes decelerated vegetative growth rate that cannot be compensated by other mitochondrial dicarboxylate carrier isoforms**

DIC2 is targeted to the mitochondrion when transiently expressed (30) and has recently been identified in the mitochondrial proteome by mass spectrometry (31, 32). When DIC2-GFP is stably expressed in Arabidopsis, the fusion protein was found as spherical to elongated structures that colocalised with the mitochondrial dye tetramethylrhodamine (TMRM) (Fig. S1). No overlapping of signal between DIC2-GFP and chloroplast auto-fluorescence was observed in leaf tissue, indicating that DIC2 localises to mitochondria in Arabidopsis.

Three T-DNA insertion lines were obtained in order to study the possible physiological and metabolic consequences of a defect in DIC2 (At4g24570) function *in planta*. Only the homozygous *dic2-1* line has a T-DNA insertion within the open reading frame of *DIC2*, resulting in the complete loss of *DIC2* transcript (Fig. 1A and Fig. S2A). Using selective reaction monitoring mass spectrometry (SRM-MS) to determine protein abundances (33), we found that two different DIC2 peptides, detectable in Col-0, were not detectable above baseline chemical noise in mitochondria isolated from *dic2-1* plants (Fig.

1A and Fig. S2B), confirming *dic2-1* as a null mutant for DIC2. Given that *DIC2* is more expressed in green tissues than in roots (24), it is expected that the loss of DIC2 would have a greater impact on vegetative growth. Indeed, the homozygous *dic2-1* was characterized by a significantly decreased rate of rosette expansion (Fig. 1B and Fig. S2C). From day 42, the number of leaves emerged from Col-0 and *dic2-1* was identical, but the mutant leaves were smaller and curly with a more rugose surface (Fig. S2D). *dic2-1* could not reach the full rosette diameter of Col-0 after one week of bolting (Fig. S2E). *dic2-1*-specific phenotypes could be observed regardless of the photoperiod (Fig. S2F). These phenotypes could be restored by introducing *DIC2* under the control of its native promoter (*dic2-1/gDIC2*) or a cauliflower mosaic virus 35S promoter (*dic2-1/DIC2 OE*). While full complementation was reached through the native promoter, 35S-driven expression of *DIC2* resulted in a slight delay in phenotype restoration in the *dic2-1* background and led to a reduced rosette size in Col-0 background (Fig. 1B, Fig. S2G and Table S1), indicating that the correct dose of *DIC2* expression is essential for normal leaf growth.

DIC2 shares high amino acid sequence similarity as well as broad and identical substrate preferences with two mitochondrial dicarboxylate carriers DIC1 and DIC3 as determined *in vitro* (24). Liposome-based transport studies also found overlapping substrate preferences with succinate-fumarate carrier 1 (SFC1), dicarboxylate-tricarboxylate carrier (DTC) and uncoupling protein 1 (UCP1) (25, 26, 34). The loss of DIC2 resulted in a modest two- to three-fold increase in *DIC1* and *DIC3* transcripts at night, but not at mid-day, while the transcripts of the other three proteins were not affected (Fig. S2H). To test the hypothesis of functional redundancy within the DIC family, we attempted to rescue the *dic2-1* phenotype by expressing *DIC1* and *DIC3* in the *dic2-1* background (*dic2-1/DIC1 OE* and *dic2-1/DIC3 OE* respectively), but neither could complement the loss of DIC2, not even partially (Fig. 1B). These results indicate that DIC2 is unlikely to share substrate preferences and/or specificities with DIC1 or DIC3 *in planta* and emphasize the need for an *in vivo* assessment.

### Malate is the major dicarboxylate substrate of DIC2 in isolated Arabidopsis mitochondria

The inability of DIC1 or DIC3 to rescue *dic2-1* phenotypes prompted us to reinvestigate DIC2 function in detail. In order to maintain DIC2 close to its true functional context, while being able to control substrate availabilities, we used isolated mitochondria as a model system to connect previous *in vitro* insights from liposome assays and the more complex *in vivo* situation. We first examined if malate and succinate are the main substrates for DIC2 in isolated mitochondria, as inferred previously by a liposome-based approach (24). To this end, mitochondria purified from Col-0, *dic2-1* and *dic2-1/gDIC2* were tested for their ability to consume dicarboxylates under state III respiration conditions (measured as O<sub>2</sub> consumption coupled to ATP synthesis) and to generate and export metabolites synthesised from the substrates provided (measured by LC-SRM-MS analysis of the separated mitochondrial and the extra-mitochondrial space fractions; Fig. 2A).

163 Titrations with respiratory substrates at different concentrations revealed no obvious differences in  
164 the rate of internal or external NADH-driven O<sub>2</sub> consumption between Col-0 and *dic2-1* (Fig. 2B; Fig.  
165 S3A). No change in the abundance or activity of electron transport chain (ETC) supercomplexes (Fig.  
166 S4A), the relative abundance of TCA cycle enzymes, pyruvate dehydrogenase or NAD-ME (Fig. S4B),  
167 or their K<sub>m</sub> and V<sub>max</sub> (Table S2) were observed when mitochondria isolated from these genotypes  
168 were compared. This eliminated the possibility of a clear defect in the ETC or a specific step of the  
169 TCA cycle in *dic2-1*; instead, any shift in the distribution of specific metabolites between the matrix  
170 and extra-mitochondrial space in the mutant could reasonably be attributed directly to the absence of  
171 DIC2 and/or indirectly to the enzymatic regulatory compensation as the result of DIC2 loss.

172 Through the action of the TCA cycle and NAD-ME, imported substrates can generate both OAA and  
173 pyruvate (Fig. 2A). Note that it is difficult to experimentally assess OAA and pyruvate independently  
174 because OAA undergoes spontaneous decarboxylation into pyruvate; therefore, we considered the  
175 pyruvate signal to represent both pyruvate and OAA levels. Upon feeding externally with 500 μM  
176 malate, pyruvate and/or OAA abundance increased linearly over time in mitochondria of Col-0 and  
177 *dic2-1/gDIC2*, whereas it levelled off in *dic2-1* (Fig. 2C, panel iv). The magnitude of *dic2-1*-specific  
178 increase in pyruvate and/or OAA content in mitochondria was far less drastic for succinate or 2-OG  
179 feeding, both of which led to the formation of malate within the matrix (Fig. 2C, panel v-vi). Consistent  
180 with this, *dic2-1* mitochondria exhibited a 20–30% lower V<sub>max</sub> for malate-dependent state III O<sub>2</sub>  
181 consumption at pH 7.2, although the K<sub>m</sub> was unchanged (Fig. 2B). When malate-dependent O<sub>2</sub>  
182 consumption by isolated mitochondria was measured at the optimal pH for NAD-ME activity  
183 (pH~6.5)(35), no difference in K<sub>m</sub> and V<sub>max</sub> between *dic2-1* and Col-0 was observed. These data  
184 pinpoint reduced malate availability in the matrix of malate-fed *dic2-1* mitochondria as a plausible  
185 cause for the observed decrease in malate-dependent respiration (via mMDH) and pyruvate and/or  
186 OAA formation. To test more directly whether DIC2 indeed imports malate into mitochondria and  
187 whether this import is restricted in *dic2-1*, we monitored the transport activity for <sup>14</sup>C-malate by isolated  
188 mitochondria in a reaction medium that lacked cofactors and ADP to allow malate to accumulate while  
189 preventing its conversion into other TCA cycle intermediates. Under such conditions, the initial uptake  
190 rate of 200 μM [<sup>14</sup>C]-malate into mitochondria of *dic2-1* was three-fold lower compared to Col-0 and  
191 *dic2-1/gDIC2* (Fig. 2D). Hence, DIC2 possesses a significant malate uptake capacity in isolated  
192 Arabidopsis mitochondria even in the presence of other potential carriers for malate transport.

193 If the role of DIC2 in 2-OG and/or succinate uptake is as important as malate transport, mutant  
194 mitochondria would be expected to display a lower O<sub>2</sub> consumption rate in their presence as well as  
195 to accumulate and/or export less of their nearest TCA cycle product(s) when these substrates are  
196 supplied. There was no significant change in succinate-stimulated Complex II-linked O<sub>2</sub> consumption  
197 (Fig. 2B), so the mutant growth phenotype was unlikely to be caused by a reduced mitochondrial  
198 succinate uptake and oxidation. 2-OG-dependent state III respiration in *dic2-1* mitochondria was



reduced in *dic2-1* mitochondria, to an extent which was strikingly similar to malate oxidation at pH 7.2 (Fig. 2B). However, DIC2 is unlikely to be a major 2-OG importer, since 2-OG, malate and succinate levels in *dic2-1* mitochondria and extramitochondrial space were not altered when 2-OG was supplied (Fig. S5C). This anomaly between O<sub>2</sub> consumption and substrate accumulation patterns may be explained by a partial feedback inhibition of mMDH reducing NADH necessary for the ETC activities and resulting in a flux diversion of malate to fumarate (Fig. 2A). Consistent with this we observed increases in fumarate accumulation and efflux by *dic2-1* mitochondria when supplied with malate and succinate (Fig. 2E, panel i-ii and iv-v). In addition, it could be due to the observed increase in pyruvate and/or OAA export rate to relief the product inhibition of mMDH when supplied with 2-OG (Fig. 2C, panel ii).

### **DIC2 is one of the mitochondrial carriers that determine the fate of citrate in energised mitochondria**

The other main discovery from our substrate feeding experiments was a much higher amount of citrate accumulating inside *dic2-1* than Col-0 mitochondria after malate (Fig. 2F panel iii), succinate or 2-OG feedings (Fig. S5C-D). If OAA and/or pyruvate exports were also limited in *dic2-1* mitochondria, matrix pyruvate and/or OAA contents would be expected to accumulate more over time with a slower combined rate of their export to the extramitochondrial space. However, pyruvate and/or OAA appear to be maintained in the mutant mitochondria in the same way as in Col-0 after malate or succinate feedings (Fig. 2C, panel i and iii). In contrast, the rate of export of citrate to the extra-mitochondrial space was decreased in *dic2-1* mitochondria when compared to Col-0 and *dic2-1/gDIC2* in malate (Fig. 2F panel i), succinate or 2-OG feedings (Fig. S5C-D). The degree of decrease in each case was different depending on substrate concentration and the number of subsequent enzymatic steps leading to citrate formation. We hypothesised that excess citrate in *dic2-1* mitochondria was caused by a defect in citrate export which then prevented OAA condensation in the citrate synthase reaction and thus suppressed mMDH activity (36). To confirm this, we tested the ability of mitochondria to directly consume citrate (Fig. S5E). Under such conditions, NAD-ME and mMDH activities became inhibited, as demonstrated by the low mitochondrial export rate of pyruvate and/or OAA (Fig. S5E). There was no change in citrate-dependent O<sub>2</sub> consumption mitochondria from all genotypes (Fig. 2B), further confirming that citrate import was not affected and the reduction in malate- and 2-OG-dependent respiration by *dic2-1* was likely caused by the citrate accumulation in the matrix triggering an OAA inhibition of mMDH.

While the uptake rates of citrate by mitochondria were not altered significantly over time (Fig. 2F, panel ii), the rate of citrate accumulation in *dic2-1* mitochondria was two- to three-fold higher than Col-0 or *dic2-1/gDIC2* (Fig. 2F, panel iv). *dic2-1* mitochondria appeared to be oxidising excess citrate through the TCA cycle (Fig. 2A) as evident by a higher rate of 2-OG and fumarate accumulation in *dic2-1* mitochondria and an increased fumarate export (Fig. 2E, panel iii and vi; Fig. S5E). Similar

results were also observed when mitochondria were externally provided with isocitrate (Fig. S5F). We could not observe any obvious change in import and export rates of succinate, 2-OG and pyruvate by *dic2-1* mitochondria, indicating that other carriers with a similar set of *in vitro* substrates as DIC2, as previously observed in proteoliposome-based studies, may be able to compensate for its absence. Taken together, DIC2 is directly responsible for malate uptake, and we hypothesised that either citrate is the counter ion, or DIC2 is able to separately transport these organic acids in opposing directions. The fact that citrate export was not completely abolished by the loss of DIC2 would suggest that there are also other citrate export carriers present in the inner mitochondrial membrane.

### **DIC2 function effects leaf dark respiration by modulating NAD homeostasis**

We then set out to determine if defects in mitochondrial malate import and citrate export operate *in planta* and if they could explain the observed phenotypes of *dic2-1*. In total we investigated three scenarios where leaf mitochondria operate under different flux modes: in the light, during the transition from light to dark and in the dark. We first carried out chlorophyll fluorescence and infrared gas-exchange analyses at different light intensities, because changes in photosynthetic performance can cause many metabolic perturbations and mask other primary metabolic effects in mutants. There was no change in the CO<sub>2</sub> assimilation rate (Fig. 3A), stomatal conductance, transpiration rate, photosynthetic electron transport rate, photosystem II quantum yield or nonphotochemical quenching in *dic2-1* leaves (Fig. S6A-E). When plants were shifted to high light for 3- and 16-h, we did not detect any changes in the maximum photochemical efficiency of PSII ( $F_v/F_m$ ) between *dic2-1*, Col-0 and *dic2-1/gDIC2* (Fig. S6F). These results indicated that the loss of DIC2 has no direct impact on photosynthetic performance.

We next examined the transition from light to darkness where leaf mitochondria undergo several rapid changes in metabolic activity as photorespiration ceases and non-cyclic mode of the mitochondrial TCA cycle is activated. Upon transfer of illuminated leaves to darkness, *dic2-1* exhibited a more rapid release of CO<sub>2</sub> in the first 30-40 s before reaching a higher rate of steady-state respiratory CO<sub>2</sub> release compared to Col-0 and *dic2-1/gDIC2* (Fig. 3B). The sharp CO<sub>2</sub> release upon sudden darkness is indicative of a post-illumination burst (PIB) of respiration, an estimate of the degree of respiratory glycine oxidation (37). To examine if photorespiratory activities were altered in the mutant, we grew the mutant under high CO<sub>2</sub> (0.2%) to suppress photorespiration but no rescue of the phenotype was achieved (Fig. S6G). These data indicate that an altered photorespiratory activity after dark shift is not the primary cause for the change in PIB response by *dic2-1*. Since malate/OAA utilisation in mitochondria can control the degree of glycine oxidation by regulating NADH/NAD<sup>+</sup> levels (e.g. via a malate shuttle) (4), we hypothesised that a PIB increase in *dic2-1* could be linked to altered distribution of TCA cycle metabolites between mitochondria and cytosol (and possibly plastids), leading to changes in metabolic and/or NAD redox state in these compartments. To capture any rapid and transient changes in NAD redox state during a sudden dark shift, we utilised a fluorescent protein



biosensor Peredox-mCherry which reports cytosolic NADH/NAD<sup>+</sup> through the ratio of tSapphire to mCherry fluorescence ( $\log_{10}(tS/mC)$ ), where a higher  $\log_{10}(tS/mC)$  corresponds to a more reduced NAD pool (38, 39). We observed equally high NADH/NAD<sup>+</sup> ratios in Col-0 and *dic2-1* plants during illumination (Fig. 3C). However, upon transfer to darkness, the expected decline in NADH/NAD<sup>+</sup> ratios in the first 100 seconds was significantly slower in *dic2-1* compared to Col-0. Both differences in PIB and NAD redox status upon rapid transition to darkness indicate some defect in switching between light and dark flux modes by *dic2-1* mitochondria.

Thirdly, we examined metabolic changes to *dic2-1* leaves during the night. DIC2 expression steadily increased over the course of night-time, followed by a decline from the peak at the end of dark photoperiod to the lowest level in the light (Fig. S6H). Intriguingly, while there was no difference in the NADH/NAD<sup>+</sup> ratio between the two genotypes over the course of the dark-light-cycle (Fig. 3D), the leaf night time respiration rate ( $R_N$ ) remained consistently higher in the mutant (Fig. 3E). Given that primary metabolites are crucial determinants for regulating transcript abundance during a diurnal cycle (40), there appears to be a metabolic rearrangement in the mutant to avoid any detrimental impact of DIC2 absence on NAD redox equilibrium, albeit at the expense of heightened respiration (Fig. 3B and 3E) and slower vegetative growth (Fig. 1B). Taken together, DIC2 activity may have a greater influence on metabolism and mitochondrial respiration in the dark, most likely through modulating the TCA cycle steps in the cytosol and/or mitochondria to maintain metabolic homeostasis required for fundamental cellular functions.

## **2-oxoglutarate sharply accumulates in *dic2-1* leaves upon shift to darkness**

To gain further insight into how DIC2 transport functions are integrated into metabolism and influences NAD redox state *in vivo*, we carried out metabolite profiling of 6-week-old leaf samples collected at different time points of a diurnal cycle (Fig. 4A and Fig. S7). The metabolite profiles of malate, fumarate and succinate over a diurnal cycle were generally similar between genotypes. Also, a similar pattern in daytime glycine and serine accumulation was observed, despite a clear difference in PIB (Fig. 3B), further confirming that DIC2 function does not directly affect photorespiratory flux. The most notable metabolite level changes in *dic2-1* plants compared to Col-0 and *dic2-1/gDIC2* were observed in the first-hour after the sudden shift to darkness, including two- to four-fold higher abundances of pyruvate, citrate and isocitrate, and a remarkable 10-fold increase in 2-oxoglutarate abundance (2-OG). Several amino acids linked to 2-OG utilization also changed in abundance in *dic2-1*. In particular, the glutamate pool in *dic2-1* was larger than Col-0 and *dic2-1/gDIC2* plants one hour after the dark shift and during the light photoperiod, while GABA and glutamine abundances remained unchanged. Aspartate and alanine, which can be converted into OAA and pyruvate respectively in a reversible reaction that requires glutamate/2-OG transamination, were also more abundant in *dic2-1* after one hour of darkness, while aspartate-derived threonine accumulated in the mutant throughout the diurnal cycle. Branched chain amino acids (BCAAs), which use 2-OG as co-substrate to initiate their

catabolism in mitochondria (41), were generally higher in abundances in *dic2-1* plants at night. Overall, the metabolite profiles revealed that the loss of DIC2 function causes an impaired 2-OG metabolism in the dark, which may provide a metabolite buffer to compensate for a defect in mitochondrial DIC2 transport activity while cytosolic NAD redox state is maintained.

### **A defect in organic acid use causes accelerated leaf senescence of the DIC2 knockout during prolonged darkness**

Elevated level of BCAAs in *dic2-1* (Fig. 4A) may indicate a possible defect in mitochondrial BCAA catabolism due to changes in the uptake of BCAAs and/or their derivatives into the matrix. Most BCAA catabolism mutants accumulate BCAAs and are more susceptible to early senescence during prolonged darkness (42-47). To test if intermediates of BCAA catabolism could also be DIC2 substrates, we subjected Arabidopsis plants to darkness for 15 days. The mutant exhibited an accelerated decline in  $F_v/F_m$  beginning around 7 days of darkness (Fig. S8A). Leaves of *dic2-1* were more yellowed compared with the Col-0 and the *dic2-1/gDIC2* after 12 days (Fig. S8B). When 15 days dark-treated plants were transferred back to the normal short-day cycle, only Col-0 and *dic2-1/gDIC2* could recover after seven days. Next, we measured the abundance of organic acids, amino acids and branched chain 2-oxoacids (BCKA) in 10 days dark-treated transgenic plants with known mitochondrial responses to carbon starvation (Fig. 4B). Knockout mutants with defects in mitochondrial BCAA catabolism, *mcca1-1*, *mccb1-1* and *hml1-2*, displayed accelerated senescence and had higher amounts of BCAAs than Col-0 as observed previously (43, 48), as well as accumulated BCKA. In comparison, the double knockout of glutamate dehydrogenase (*gdh dKO*), which does not directly participate in BCAA catabolism but senesces more rapidly under prolonged darkness (49), significantly accumulated BCAAs without altering the abundance of BCKA. The loss of DIC2 resulted in slight but significant accumulation of valine but not leucine, isoleucine and BCKAs when compared to Col-0 and two different complemented lines. These results indicate that DIC2 is not involved directly in the transport of BCAAs or their derivatives.

Strikingly, all TCA cycle intermediates were significantly higher in abundance in *dic2-1* upon 10 days of dark treatment, whereas other mutants only displayed minor changes. To identify the TCA cycle metabolites that were affected the most by the absence of DIC2, we carried out a time-course measurement of organic acids contents over 12 days of prolonged darkness (Fig. 4C and Fig. S8C). When  $F_v/F_m$  began to decline more rapidly in *dic2-1* on day 7 (Fig. S8A), only malate, 2-OG and citrate were significantly more accumulated. While all TCA cycle intermediates were significantly increased in the mutant 10 days after dark treatment, malate and 2-OG accumulated at least 10 times higher in abundance in the mutant than Col-0 and *dic2-1/gDIC2*. Citrate abundance in the Col-0 and *dic2-1/gDIC2* progressively declined from day 3 to day 12 of darkness, whereas it remained unchanged in *dic2-1* plants throughout the treatment. Notably, the accumulation of these metabolites by *dic2-1* in *planta* would be consistent with a failure to properly regulate mitochondrial malate import and citrate

export. Throughout a diurnal cycle, pool sizes of these metabolites were unchanged (Fig. 4A); it was only when plants were exposed to dark-induced starvation that altered patterns in the utilization of specific organic acids manifested (Fig. 4C).

# **DIC2 modulates metabolic flux through TCA cycle and amino acid metabolism to support citrate export at night**

We next further investigated the cause of the increased  $R_N$  in *dic2-1*. An increased night-time consumption rate of sucrose, but not of glucose or fructose, by *dic2-1* was observed (Fig. 5A and Fig. S9A). The expression of several nutrient-responsive senescence markers, SAG101 (50), WRKY53 (51) and SEN1 (52), were also highly upregulated in the mutant in the dark but not in the light (Fig. 5B and Fig. S9B), suggesting night time starvation. These results, combined with a lack of photosynthetic differences (Fig. 3A, Fig. S6A-E), suggest that an accelerated depletion rate of carbon stores via respiration is leading to night time starvation in *dic2-1*. Thus, changes in metabolite abundances noted above were accompanied by a higher sucrose catabolism in the mutant at night. When leaf discs were incubated in the dark with uniformly labelled  $^{14}\text{C}$ -malate or  $^{14}\text{C}$ -leucine and the evolution of  $^{14}\text{CO}_2$  was monitored, we found that *dic2-1* showed higher  $^{14}\text{CO}_2$  emissions than Col-0 and *dic2-1/gDIC2* from malate but not leucine (Fig. 5C). The observed increase in BCAAs accumulation in *dic2-1* in the dark (Fig. 4A) was contributed by increased TCA cycle fluxes into biosynthetic pathways and/or an elevated proteolysis, while BCAAs breakdown for respiration remained unchanged. Thus, these data indicated that the loss of DIC2 results in increased sucrose utilization (or export for use by other tissues) and TCA cycle-facilitated respiration to compensate for a failure to maintain the homeostasis of organic acid oxidation.

The observed decrease in substrate-dependent  $\text{O}_2$  consumption by isolated mitochondria (Fig. 2B) did not explain the faster dark respiration of intact leaves (Fig. 3E). This could be due to the absence of any extramitochondrial metabolism, which *in vivo* maintains metabolite supply for sustaining mitochondrial transport activities, TCA cycle and respiration in response to rearranged metabolism and transport in the mutant. To account for the apparent homeostasis in metabolite pool sizes (Fig. 4A), we postulated that there could be a flux change in certain steps of metabolism to compensate for the reduced malate import and citrate export from mitochondria. To determine if *dic2-1* metabolises carbon differently, we traced the flux of U- $^{13}\text{C}$ -glucose into the TCA cycle and closely related amino acids in leaf discs in the dark for 8 hours, and the  $^{13}\text{C}$ -tracing data was normalised by taking into consideration the differences in dark respiration rate (Fig. 5D; SI Dataset 1; SI Methods). Consistent with DIC2's proposed function as a citrate transporter, *dic2-1* displayed a decreased rate of citrate labelling over the course of dark incubation (Fig. 5E). Such a decrease was unlikely to be contributed by a reduction in peroxisomal citrate synthase because labelled acetyl-CoA cannot be directly exported from mitochondria (53), and the existence of a carnitine/acylcarnitine carrier in plant mitochondria is questionable since its closest homolog BOU has recently been reported to transport

glutamate (54). On the other hand, the citrate pool remained stable in the dark in *dic2-1* (Fig. 4A) possibly due to compensation by altered citrate turnover rates in other compartments. A decrease in OAA availability from cytosolic phosphoenolpyruvate (PEP) carboxylase could also be ruled out, since labelling of m+3 aspartate (a proxy for labelled OAA) was not altered (Fig. S10A). Decreased citrate labelling was accompanied by a significant increase in the abundance of labelled 2-OG due to a higher total pool in the mutant (Fig. 5F; SI Dataset 1), which coincided with an increased rate of  $^{13}\text{C}$  incorporation into glutamine (Fig. 5G). These increases could be facilitated by a higher mitochondrial glutamate efflux rate since there was a higher 2-OG accumulation in citrate-fed *dic2-1* mitochondria (Fig. S5E), implying that an enhanced flux into glutamine was necessary to remove excess mitochondrial 2-OG by mitochondrial glutamate transamination reactions in concert with plastidic glutamine synthase (55). Downstream extra-mitochondrial biosynthetic pathway of aspartate-derived amino acids, asparagine and threonine, were increased in abundances in the mutant (Fig. 5H-I), while the amount of labelled succinate, fumarate, malate and aspartate via the TCA cycle or PEP-OAA interconversion did not change (Fig. 5J and Fig. S10B-D). All these increases are consistent with a metabolic diversion of excess malate that was not consumed by mitochondria for citrate synthesis (due to a decrease in malate uptake and product inhibition of mMDH in the matrix) into aspartate. Overall, the  $^{13}\text{C}$  feeding data helped to explain how the mitochondrial phenotypes of *dic2-1* loss (Fig. 2) are significantly overcome in a whole plant metabolic context to establish day and night homeostasis and retain a viable plant albeit with stunted growth rate (Fig. 1). Only at day to night transitions and prolonged darkness do the consequences of these unusual metabolic fluxes yield temporary gross imbalances in metabolite pools.

## DISCUSSION

It was reported that DIC2, DIC1 and DIC3 are carriers for malate and OAA exchange to regulate NAD redox and photorespiration in the light (56-58). In addition, several mitochondrial malate carriers, including DIC2, were found to have a broad substrate preference for other dicarboxylates, tricarboxylates and/or amino acids with close resemblance to dicarboxylates *in vitro* (24-26), but their actual contributions to mitochondrial malate transport *in organello* or *in planta* have not been verified. Determining if these types of carriers are generalists or specialists *in vivo* is critical in any future attempt to modify mitochondrial substrate use, or to understand if transport is a point of control in metabolic models of plant cell function.

Malate import and citrate export are two of the most critical fluxes that mitochondria contribute to the rest of the cellular metabolic network in plants (59-61). Malate plays a pivotal role in mediating metabolic redox exchange between cellular compartments (57, 62). On the one hand, citrate produced in mitochondria is the major source of cellular citrate when the TCA cycle operates at night in mature green leaves. Here, we identified DIC2 as a single carrier linking these functions to mitochondrial anaplerotic metabolism. While our data reveal that other carriers can also mediate at

least one of these two functions to provide partial functional backup, that is, however, insufficient to maintain metabolism unperturbed.

Given the prior evidence of broad DIC1 substrate preference *in vitro* and high amino acid identity among the DIC homologs, our finding that DIC1 could not complement the *dic2-1* phenotype (Fig. 1B, Fig. S2H) was unexpected (Fig. S11). Yet, inferring *in vivo* function from *in vitro* data on transport specificity data is known to be problematic and has prevented capture of the biological importance of transport of other substrates. For example, PAPST1 and PAPST2, which are 78% identical in amino acid sequence, both transport 3'-phosphoadenosine 5'-phosphate (PAP) and 3'-phosphoadenosine 5'-phosphosulfate (PAPS) in liposomes with only slight differences in their efficiency in driving ATP exchange (63). However, their true *in vivo* function was revealed only after additional genetic, biochemical and metabolomic approaches were employed: PAPST1 being responsible for the majority of PAPS/PAP transport to regulate glucosinolate biosynthesis in plastids, while PAPST2 fulfils a stress signalling role through PAP/AT(D)P exchange in chloroplasts and mitochondria (63, 64). In a similar way, while liposomes showed the ability of DIC2 to transport a variety of dicarboxylates and even citrate, albeit poorly (24), they could not accurately predict apparent specificity or directionality of transport in intact mitochondria (Fig. 2) or the *in vivo* consequences of DIC2 loss (Fig. 3-5).

Revealing the role for DIC2 in citrate export required moving to a less reductionist system, i.e. to the exploration of metabolic processes in isolated mitochondria (Fig. 2). Citrate produced in the mitochondria is predicted to be exported for fatty acid biosynthesis via the cytosolic ATP-dependent citrate lyase (65), or for storage in the vacuole based on flux prediction and <sup>13</sup>C labelling analysis (20, 66), although it is also possible to fuel respiration in mitochondria isolated from storage tissues by externally supplying an excess amount of citrate (67). Given the importance of mitochondria-supplied citrate to metabolism in green tissues, it is expected that a complete block in mitochondrial citrate synthesis and export would result in severe reduction in post-germination vegetative growth. A null mutant of mitochondrial citrate synthase has not been reported to date, and a reduction in mitochondrial citrate synthase activity only resulted in a small change in vegetative growth phenotype (21, 22). Unlike in yeast and mammals, the function of plant mitochondrial pyruvate carrier (MPC) seems to be non-essential since its absence has no effect on growth or the cellular citrate pool (16, 68). In comparison, mutants lacking the activity in one of the subunits of mitochondrial pyruvate dehydrogenase complex (mPDC) or both mMDH isoforms, which catalyse acetyl-CoA and OAA formation respectively required for citrate synthesis, are significantly slower in vegetative growth (23, 69, 70). mPDC mutation causes a severe blockage in citrate generation in leaf (69) that does not appear to be compensated by altering pyruvate decarboxylation and citrate synthesis activities in other compartments. By contrast, OAA import into the mitochondria is sufficient to maintain a citrate pool in the mMDH double knockout similar to that in the wildtype at the expense of elevated respiration



and increased accumulation of dicarboxylates (23). Here, we observed a reduction in vegetative growth in *dic2-1*, with decreases in citrate export by isolated mitochondria (Fig. 2F) and *in vivo* <sup>13</sup>C-glucose labelling into citrate (Fig. 5E) when compared to the wildtype. Unlike mMDH and mPDC mutants, however, the steady state pool of organic acids, including citrate, was surprisingly stable in *dic2-1* (Fig. 4A). This suggests that fatty acid turnover is affected, either through increasing citrate synthesis via the last step of peroxisomal  $\beta$ -oxidation and/or decreasing citrate breakdown during the initial steps of plastidic fatty acid biosynthesis. The former is a more likely scenario given that *dic2-1* phenotypes are observed mostly during darkness when fatty acid biosynthesis is ineligible (71), and the transcripts of two peroxisomal citrate synthase isoforms are more abundant at night (72, 73) and during prolonged darkness (74). Lowering fatty acid accumulation by limiting triacylglycerol depletion helps plants survive prolonged darkness by dampening the degree of lipid peroxidation (75). Thus, the increased susceptibility to dark-induced senescence by *dic2-1* (Fig. 4B-C and Fig. S8) could be caused by a loss of synchronisation in fatty acid turnover with peroxisomal citrate synthesis and export, as a result of increased demand for peroxisomal citrate to compensate for a reduction in mitochondrial carbon supply. The requirement for an equilibrium between organellar citrate synthesis and fatty acid breakdown to prevent excess reactive oxygen species accumulation would reasonably explain why a strong DIC2 transcriptional response is commonly observed during abiotic stress treatments, including touch and sound vibration (76, 77), phosphate deficiency (78), light-to-dark transition (79) and cold, drought and UV stresses (80). Overall, these data strongly support a function of DIC2 in plant mitochondrial citrate transport, with a reduction in citrate export as a direct consequence of DIC2 loss, rather than a side effect.

The existence of multiple modes of TCA cycle substrate transport has been proposed (27, 28) but the lack of clarity as to the identity and substrate specificity of carriers responsible has been hindering our understanding on how they cooperate to support the integration of mitochondrial carbon metabolism into the wider cellular metabolic network (17). In the case of *dic2-1*, we found that there was no change in the uptake of externally supplied substrate by fully energised isolated mitochondria (Fig. S5 “INPUT”). Residual malate import and citrate export are maintained in *dic2-1* mitochondria (Fig. 2F, Fig. S5B), suggesting that other carriers exist to partially compensate for the absence of DIC2 activity. The majority of an added dicarboxylate was oxidised to pyruvate and/or OAA in mutant mitochondria with a diversion of excess malate destined for OAA and citrate formation into a hydration reaction to produce fumarate, which was then exported from isolated mitochondria (Fig. 2E) and redirected towards aspartate metabolism *in vivo* as seen by increases in asparagine and threonine labelling (Fig. 5H-I). It is remarkable that, despite all these changes, *in vivo* cytosolic NADH/NAD<sup>+</sup> ratios in *dic2-1* leaves did not differ from wildtype throughout the night (Fig. 3D) with only a glimpse of change during a light-to-dark transition (Fig. 3C). We speculate that the homeostasis of NAD redox state in the mutant can be explained by at least one of the following: (i) an increased rate of malate



oxidation being offset by a reduction in isocitrate oxidation in the cytosol; (ii) a rapid remobilisation of excess NADH into the intermembrane space of mitochondria where it was oxidised by external NADH dehydrogenase, thereby raising leaf respiration in the dark (Fig. 3E); and/or (iii) excess reductant used for diverting malate into threonine generation via aspartate catabolism, requiring 2 NADPH and 2 ATP molecules (81). Consistently, metabolite labelling and profiling have highlighted the flexibility of metabolism when multiple carriers with varying substrate preferences are present. For instance, the loss of mitochondrial citrate carrier in *Drosophila* larvae causes only a mild reduction in citrate content concomitant with increased malate and fumarate levels (82). Malate and citrate levels are slightly decreased in mice with suppressed expression of the mitochondrial dicarboxylate carrier (83). Silencing of the mitochondrial glutamate carrier in colorectal tumor cells resulted in a relatively small increase in cellular glutamate content whereas the aspartate level was reduced by ~45% (84). In plants, studies of mitochondrial carrier mutants reported to date are unable to directly link growth and/or metabolic phenotype with gene function (85-87). It is possible that, apart from functional redundancy, changes in metabolic fluxes occur without altering overall metabolite pool or physiology, which can only be captured by sensitive measurements under specific external conditions.

In conclusion, we have refined the current molecular identity of DIC2 to be a mitochondrial malate import and citrate export carrier in *Arabidopsis*, the absence of which leads to growth retardation. The importance of mitochondrial organic acid exchange carriers in plants has been discussed for decades, but it is only in the last decade that their identities are beginning to be unravelled through heterologous systems. By utilising a broad approach in combination with reverse genetics, however, we demonstrate that carrier analysis in heterologous systems are only the start to reveal the true nature of DIC2 *in vivo*. Given the lack of genetic clarity of many plant mitochondrial carriers, it is reasonable to suspect that the true identity of many other carriers has yet to be unravelled. Here, we provide a blueprint for characterising the *in organello* and *in vivo* function of a plant mitochondrial carrier that requires an integrated approach to analyse genetic lines. Such approaches reveal systems characteristics that may be strictly required from carrier function and specificity, such as exact membrane composition, bioenergetic status, pH and relative local metabolite pool sizes and fluxes. A complete, precise identification of mitochondrial metabolite carriers and their substrate preferences with kinetic characteristics and transport orientation will assist in improving genome scale metabolic models, as well as refining the role of DIC2 role in underpinning the remarkable flexibility of plant cell metabolism.

## METHODS

### Plant Material and Growth Conditions

The *DIC2* T-DNA insertion lines were obtained from GABI-Kat (*dic2-1* GK-217B05, *dic2-2* GK-833F11 and *dic2-3* GK-047F03)(88). *gdh* dKO (*gdh1-2* x *gdh2-1*), *mcca1-1*, *mccb1-1* and *hml1-2* were obtained from Arabidopsis Biological Resource Center (CS860075, CS66518, CS66519 and CS66521 respectively (49, 89)). A detailed description of growth conditions, generation of transgenic lines and quantitative transcript analysis is provided in SI Methods.

### **Isolation of mitochondria, O<sub>2</sub> electrode measurements, enzyme activity assays and metabolite uptake assays by silicone oil centrifugation**

Mitochondria were isolated from two-week-old Arabidopsis seedlings as described previously (90). O<sub>2</sub> consumption by purified mitochondria was measured in a computer-controlled Clark-type O<sub>2</sub> electrode unit according to Lee et al. (91). *In vitro* activities of TCA cycle enzymes in isolated mitochondria were measured as described by Huang et al. (92). Time-course measurements of substrate uptake by isolated mitochondria were carried out using silicone oil centrifugation technique according to Lee et al. (93) with modifications. Fractions above (extra-mitochondrial space) and bottom (pellet, mitochondria) were collected, and metabolites were methanol-extracted and detected by mass spectrometry. Additional information is provided in SI Methods.

### **Analyses of metabolites by mass spectrometry**

For GC-MS analysis of sugars, derivatised metabolite samples were analysed by an Agilent 6890 gas chromatograph coupled with a 7683B Automatic Liquid Sampler and a 5973N mass selective detector. For SRM-MS analysis of organic acids. For measuring organic acids amino acids, samples were analysed by an Agilent 1100 HPLC system coupled to an Agilent 6430 Triple Quadrupole (QQQ) mass spectrometer equipped with an electrospray ion source. A detailed description is provided in SI Methods.

### **<sup>13</sup>C-glucose labelling of Arabidopsis leaf discs and analysis of labelled metabolites**

Leaf discs (~50 mg) were prepared from short-day grown (8-h light/16-h dark) plants 1 hour before the end of a normal light photoperiod. They were floated on leaf respiratory buffer containing 20 mM U-<sup>13</sup>C-glucose (99% purity, Sigma Aldrich). At the specified incubation time, leaf discs were briefly washed with respiratory buffer to remove excess labelled glucose and frozen in liquid nitrogen for metabolite extraction as stated above. Analyses of total, untargeted metabolites were performed using an Agilent 1100 HPLC system coupled to an Agilent 6510 Quadrupole/Time-of-Flight (Q-TOF) mass spectrometer equipped with an electrospray ion source. Peak extraction, isotopic correction for natural <sup>12</sup>C abundances and analysis of isotopic abundances are described in SI Methods.

### **Relative quantitation of mitochondrial protein abundances by LC-MRM-MS**

Multiple reaction monitoring (MRM) was carried out exactly as described previously (94), except trypsin was added to the protein samples in a mass ratio of 1:20. Peptide abundances from each

sample were normalised against VDAC in which its abundance was identical between mitochondria from Col-0, *dic2-1* and *dic2-1/gDIC2* based on western blotting. Transitions used for multiple reaction monitoring are provided in Table S3.

## ACKNOWLEDGEMENT

This work was supported by the Australian Research Council (ARC) Centre of Excellence in Plant Energy Biology (A.H.M., grant number CE140100008) and the German Research Foundation (DFG) (M.S., grant number SCHW1719/5-1 as part of the package grant PAK918). We also thank Dr Brendan O'Leary (The University of Western Australia) for a critical reading of the manuscript.

## REFERENCES

1. Scheibe R (2004) Malate valves to balance cellular energy supply. *Physiologia Plantarum* 120(1):21-26.
2. Coleman JOD & Palmer JM (1972) The oxidation of malate by isolated plant mitochondria. *European Journal of Biochemistry* 26(4):499-509.
3. Rustin P, Rötig A, & Alin M-F (1985) Continuous measurement of oxaloacetate in purified mitochondria from the leaves of *Kalanchoë blossfeldiana*. *Physiologia Plantarum* 63(2):201-207.
4. Journet E-P, Neuburger M, & Douce R (1981) Role of glutamate-oxaloacetate transaminase and malate dehydrogenase in the regeneration of NAD<sup>+</sup> for glycine oxidation by spinach leaf mitochondria. *Plant Physiology* 67(3):467-469.
5. Kearney EB, Ackrell BAC, & Mayr M (1972) Tightly bound oxalacetate and the activation of succinate dehydrogenase. *Biochemical and Biophysical Research Communications* 49(4):1115-1121.
6. Day DA & Hanson JB (1977) Pyruvate and malate transport and oxidation in corn mitochondria. *Plant Physiology* 59(4):630-635.
7. Wiskich JT & Day DA (1982) Malate oxidation, rotenone-resistance, and alternative path activity in plant mitochondria. *Plant Physiology* 70(4):959-964.
8. Lance C & Rustin P (1984) The central role of malate in plant metabolism. *Physiologie Végétale* 22:625-641.
9. de Oliveira Dal'Molin CG, Quek L-E, Palfreyman RW, Brumley SM, & Nielsen LK (2010) C4GEM, a genome-scale metabolic model to study C<sub>4</sub> plant metabolism. *Plant Physiology* 154(4):1871-1885.
10. Tcherkez G, Cornic G, Bligny R, Gout E, & Ghashghaie J (2005) *In vivo* respiratory metabolism of illuminated leaves. *Plant Physiology* 138(3):1596-1606.
11. Tcherkez G, *et al.* (2009) *In folio* respiratory fluxomics revealed by <sup>13</sup>C isotopic labeling and H/D isotope effects highlight the noncyclic nature of the tricarboxylic acid "cycle" in illuminated leaves. *Plant Physiology* 151(2):620-630.
12. Hüdig M, *et al.* (2015) Plants possess a cyclic mitochondrial metabolic pathway similar to the mammalian metabolic repair mechanism involving malate dehydrogenase and L-2-hydroxyglutarate dehydrogenase. *Plant and Cell Physiology* 56(9):1820-1830.
13. Bykova NV, Møller IM, Gardeström P, & Igamberdiev AU (2014) The function of glycine decarboxylase complex is optimized to maintain high photorespiratory flux via buffering of its reaction products. *Mitochondrion* 19, Part B:357-364.
14. Kromer S (1995) Respiration during photosynthesis. *Annual Review of Plant Physiology and Plant Molecular Biology* 46(1):45-70.
15. Raghavendra AS & Padmasree K (2003) Beneficial interactions of mitochondrial metabolism with photosynthetic carbon assimilation. *Trends in Plant Science* 8(11):546-553.
16. Tronconi MA, *et al.* (2008) Arabidopsis NAD-malic enzyme functions as a homodimer and heterodimer and has a major impact on nocturnal metabolism. *Plant Physiology* 146(4):1540-1552.
17. Lee CP & Millar AH (2016) The plant mitochondrial transportome: Balancing metabolic demands with energetic constraints. *Trends in Plant Science* 21(8):662-676.
18. Igamberdiev AU, Romanowska E, & Gardeström P (2001) Photorespiratory flux and mitochondrial contribution to energy and redox balance of barley leaf protoplasts in the light and during light-dark transitions. *Journal of Plant Physiology* 158(10):1325-1332.
19. Tovar-Méndez A, Miernyk JA, & Randall DD (2003) Regulation of pyruvate dehydrogenase complex activity in plant cells. *European Journal of Biochemistry* 270(6):1043-1049.
20. Cheung CYM, Poolman MG, Fell DA, Ratcliffe RG, & Sweetlove LJ (2014) A diel flux balance model captures interactions between light and dark metabolism during day-night cycles in C<sub>3</sub> and Crassulacean acid metabolism leaves. *Plant Physiology* 165(2):917-929.
21. Landschütze V, Willmitzer L, & Müller-Röber B (1995) Inhibition of flower formation by antisense repression of mitochondrial citrate synthase in transgenic potato plants leads to a specific disintegration of the ovary tissues of flowers. *The EMBO Journal* 14(4):660-666.
22. Sienkiewicz-Porzućek A, *et al.* (2008) Mild reductions in mitochondrial citrate synthase activity result in a compromised nitrate assimilation and reduced leaf pigmentation but have no effect on photosynthetic performance or growth. *Plant Physiology* 147(1):115-127.
23. Tomaz T, *et al.* (2010) Mitochondrial malate dehydrogenase lowers leaf respiration and alters photorespiration and plant growth in Arabidopsis. *Plant Physiology* 154(3):1143-1157.
24. Palmieri L, *et al.* (2008) Molecular identification of three *Arabidopsis thaliana* mitochondrial dicarboxylate carrier isoforms: Organ distribution, bacterial expression, reconstitution into liposomes and functional characterization. *The Biochemical journal* 410(3):621-629.
25. Picault N, Palmieri L, Pisano I, Hodges M, & Palmieri F (2002) Identification of a novel transporter for dicarboxylates and tricarboxylates in plant mitochondria. Bacterial expression, reconstitution, functional characterization, and tissue distribution. *The Journal of Biological Chemistry* 277(27):24204-24211.

26. Monné M, *et al.* (2018) Uncoupling proteins 1 and 2 (UCP1 and UCP2) from *Arabidopsis thaliana* are mitochondrial transporters of aspartate, glutamate, and dicarboxylates. *Journal of Biological Chemistry* 293(11):4213-4227.
27. Wiskich JT (1977) Mitochondrial metabolite transport. *Annual Review of Plant Physiology* 28(1):45-69.
28. LaNoue KF & Schoolwerth AC (1979) Metabolite transport in mitochondria. *Annual Review of Biochemistry* 48(1):871-922.
29. Klingenberg M (1979) Overview on mitochondrial metabolite transport systems. *Methods in enzymology* 56: 245-252.
30. Van Aken O, *et al.* (2009) Defining the mitochondrial stress response in *Arabidopsis thaliana*. *Molecular Plant* 2(6):1310-1324.
31. Senkler J, *et al.* (2017) The mitochondrial complexome of *Arabidopsis thaliana*. *The Plant Journal* 89(6):1079-1092.
32. Fuchs P, *et al.* (2020) Single organelle function and organization as estimated from Arabidopsis mitochondrial proteomics. *The Plant Journal* 101(2):420-441.
33. Taylor NL, *et al.* (2014) Selected reaction monitoring to determine protein abundance in Arabidopsis using the Arabidopsis Proteotypic Predictor. *Plant Physiology* 164(2):525-536.
34. Catoni E, *et al.* (2003) Identification of an Arabidopsis mitochondrial succinate–fumarate translocator. *FEBS Letters* 534(1-3):87-92.
35. Tronconi MA, Maurino VG, Andreo CS, & Drincovich MF (2010) Three different and tissue-specific NAD-malic enzymes generated by alternative subunit association in *Arabidopsis thaliana*. *Journal of Biological Chemistry* 285(16):11870-11879.
36. Fahien LA, Kmietek EH, MacDonald MJ, Fibich B, & Mandic M (1988) Regulation of malate dehydrogenase activity by glutamate, citrate, alpha-ketoglutarate, and multienzyme interaction. *Journal of Biological Chemistry* 263(22):10687-10697.
37. Rawsthorne S & Hylton CM (1991) The relationship between the post-illumination CO<sub>2</sub> burst and glycine metabolism in leaves of C<sub>3</sub> and C<sub>3</sub>-C<sub>4</sub> intermediate species of *Moricaudia*. *Planta* 186(1):122-126.
38. Wagner S, *et al.* (2019) Multiparametric real-time sensing of cytosolic physiology links hypoxia responses to mitochondrial electron transport. *New Phytologist* 224(4):1668-1684.
39. Hung Yin P, Albeck John G, Tantama M, & Yellen G (2011) Imaging cytosolic NADH-NAD<sup>+</sup> redox state with a genetically encoded fluorescent biosensor. *Cell Metabolism* 14(4):545-554.
40. Gibon Y, *et al.* (2006) Integration of metabolite with transcript and enzyme activity profiling during diurnal cycles in Arabidopsis rosettes. *Genome Biology* 7(8):R76.
41. Hildebrandt TM, Nunes-Nesi A, Araújo WL, & Braun H-P (2015) Amino acid catabolism in plants. *Molecular Plant* 8(11):1563-1579.
42. Ishizaki K, *et al.* (2005) The critical role of Arabidopsis electron-transfer flavoprotein:ubiquinone oxidoreductase during dark-induced starvation. *The Plant Cell* 17(9):2587-2600.
43. Peng C, Uygun S, Shiu S-H, & Last RL (2015) The impact of the branched-chain ketoacid dehydrogenase complex on amino acid homeostasis in Arabidopsis. *Plant Physiology* 169(3):1807-1820.
44. Latimer S, *et al.* (2018) Metabolic reconstructions identify plant 3-methylglutaconyl-CoA hydratase that is crucial for branched-chain amino acid catabolism in mitochondria. *The Plant Journal* 95(2):358-370.
45. Schertl P, Danne L, & Braun H-P (2017) 3-hydroxyisobutyrate dehydrogenase is involved in both, valine and isoleucine degradation in *Arabidopsis thaliana*. *Plant Physiology* 175(1):51-61.
46. Ishizaki K, *et al.* (2006) The mitochondrial electron transfer flavoprotein complex is essential for survival of Arabidopsis in extended darkness. *The Plant Journal* 47(5):751-760.
47. Araújo WL, *et al.* (2010) Identification of the 2-hydroxyglutarate and isovaleryl-CoA dehydrogenases as alternative electron donors linking lysine catabolism to the electron transport chain of Arabidopsis mitochondria. *The Plant Cell* 22(5):1549-1563.
48. Ding G, Che P, Ilarslan H, Wurtele ES, & Nikolau BJ (2012) Genetic dissection of methylcrotonyl CoA carboxylase indicates a complex role for mitochondrial leucine catabolism during seed development and germination. *The Plant Journal* 70(4):562-577.
49. Miyashita Y & Good AG (2008) NAD(H)-dependent glutamate dehydrogenase is essential for the survival of *Arabidopsis thaliana* during dark-induced carbon starvation. *Journal of Experimental Botany* 59(3):667-680.
50. He Y & Gan S (2002) A gene encoding an acyl hydrolase is involved in leaf senescence in Arabidopsis. *The Plant Cell* 14(4):805-815.
51. Miao Y & Zentgraf U (2007) The antagonist function of Arabidopsis WRKY53 and ESR/ESP in leaf senescence is modulated by the jasmonic and salicylic acid equilibrium. *The Plant Cell* 19(3):819-830.
52. Oh SA, Lee SY, Chung IK, Lee C-H, & Nam HG (1996) A senescence-associated gene of Arabidopsis thaliana is distinctively regulated during natural and artificially induced leaf senescence. *Plant Molecular Biology* 30(4):739-754.



53. Pietrocola F, Galluzzi L, Bravo-San Pedro JM, Madeo F, & Kroemer G (2015) Acetyl coenzyme A: A central metabolite and second messenger. *Cell Metabolism* 21(6):805-821.
54. Porcelli V, et al. (2018) Molecular identification and functional characterization of a novel glutamate transporter in yeast and plant mitochondria. *Biochimica et Biophysica Acta (BBA) - Bioenergetics* 1859(11):1249-1258.
55. Masclaux-Daubresse C, et al. (2006) Glutamine synthetase-glutamate synthase pathway and glutamate dehydrogenase play distinct roles in the sink-source nitrogen cycle in tobacco. *Plant Physiology* 140(2):444-456.
56. Linka N & Weber APM (2010) Intracellular metabolite transporters in plants. *Molecular Plant* 3(1):21-53.
57. Selinski J & Scheibe R (2019) Malate valves: Old shuttles with new perspectives. *Plant Biology* 21(S1):21-30.
58. Palmieri F, Pierri CL, De Grassi A, Nunes-Nesi A, & Fernie AR (2011) Evolution, structure and function of mitochondrial carriers: A review with new insights. *The Plant Journal* 66(1):161-181.
59. Sweetlove LJ, Beard KF, Nunes-Nesi A, Fernie AR, & Ratcliffe RG (2010) Not just a circle: Flux modes in the plant TCA cycle. *Trends in Plant Science* 15(8):462-470.
60. Fernie AR, Carrari F, & Sweetlove LJ (2004) Respiratory metabolism: Glycolysis, the TCA cycle and mitochondrial electron transport. *Current Opinion in Plant Biology* 7(3):254-261.
61. Lee CP, et al. (2016) MSL1 is a mechanosensitive ion channel that dissipates mitochondrial membrane potential and maintains redox homeostasis in mitochondria during abiotic stress. *The Plant Journal* 88(5):809-825.
62. Zhao Y, Yu H, Zhou J-M, Smith SM, & Li J (2020) Malate circulation: Linking chloroplast metabolism to mitochondrial ROS. *Trends in Plant Science*. 25(5):446-454
63. Ashykhmina N, et al. (2019) PAPST2 plays critical roles in removing the stress signaling molecule 3'-phosphoadenosine 5'-phosphate from the cytosol and its subsequent degradation in plastids and mitochondria. *The Plant Cell* 31(1):231-249.
64. Gigolashvili T, et al. (2012) The Arabidopsis thylakoid ADP/ATP carrier TAAC has an additional role in supplying plastidic phosphoadenosine 5'-phosphosulfate to the cytosol. *The Plant Cell* 24(10):4187-4204.
65. Fatland BL, Nikolau BJ, & Wurtele ES (2005) Reverse genetic characterization of cytosolic acetyl-CoA generation by ATP-citrate lyase in Arabidopsis. *The Plant Cell* 17(1):182-203.
66. Gauthier PPG, et al. (2010) *In folio* isotopic tracing demonstrates that nitrogen assimilation into glutamate is mostly independent from current CO<sub>2</sub> assimilation in illuminated leaves of *Brassica napus*. *New Phytologist* 185(4):988-999.
67. Journet EP & Douce R (1983) Mechanisms of citrate oxidation by percoll-purified mitochondria from potato tuber. *Plant Physiology* 72(3):802-808.
68. He L, et al. (2019) Mitochondrial pyruvate carriers prevent cadmium toxicity by sustaining the TCA cycle and glutathione synthesis. *Plant Physiology* 180(1):198-211.
69. Ohbayashi I, et al. (2019) Mitochondrial pyruvate dehydrogenase contributes to auxin-regulated organ development. *Plant Physiology* 180(2):896-909.
70. Yu H, et al. (2012) A mutation in the E2 subunit of the mitochondrial pyruvate dehydrogenase complex in Arabidopsis reduces plant organ size and enhances the accumulation of amino acids and intermediate products of the TCA cycle. *Planta* 236(2):387-399.
71. Bao X, Focke M, Pollard M, & Ohlrogge J (2000) Understanding *in vivo* carbon precursor supply for fatty acid synthesis in leaf tissue. *The Plant Journal* 22(1):39-50.
72. Smith SM, et al. (2004) Diurnal changes in the transcriptome encoding enzymes of starch metabolism provide evidence for both transcriptional and posttranscriptional regulation of starch metabolism in Arabidopsis leaves. *Plant Physiology* 136(1):2687-2699.
73. Gibon Y, et al. (2004) A robot-based platform to measure multiple enzyme activities in Arabidopsis using a set of cycling assays: Comparison of changes of enzyme activities and transcript levels during diurnal cycles and in prolonged darkness. *The Plant Cell* 16(12):3304-3325.
74. van der Graaff E, et al. (2006) Transcription analysis of Arabidopsis membrane transporters and hormone pathways during developmental and induced leaf senescence. *Plant Physiology* 141(2):776-792.
75. Fan J, Yu L, & Xu C (2017) A central role for triacylglycerol in membrane lipid breakdown, fatty acid  $\beta$ -oxidation, and plant survival under extended darkness. *Plant Physiology* 174(3):1517-1530.
76. Van Aken O, et al. (2016) Mitochondrial and chloroplast stress responses are modulated in distinct touch and chemical inhibition phases. *Plant Physiology* 171(3):2150-2165.
77. Ghosh R, et al. (2016) Exposure to sound vibrations lead to transcriptomic, proteomic and hormonal changes in Arabidopsis. *Scientific Reports* 6:33370.
78. Lin WD, et al. (2011) Coexpression-based clustering of Arabidopsis root genes predicts functional modules in early phosphate deficiency signaling. *Plant Physiology* 155(3):1383-1402.



79. Lee D, Polisensky DH, & Braam J (2005) Genome-wide identification of touch- and darkness-regulated Arabidopsis genes: A focus on calmodulin-like and XTH genes. *New Phytologist* 165(2):429-444.
80. Kilian J, et al. (2007) The ATGENEXPRESS global stress expression data set: Protocols, evaluation and model data analysis of UV-B light, drought and cold stress responses. *The Plant Journal* 50(2):347-363.
81. Jander G & Joshi V (2009) Aspartate-derived amino acid biosynthesis in *Arabidopsis thaliana*. *Arabidopsis Book* 7:e0121-e0121.
82. Li H, Hurlburt AJ, & Tennessen JM (2018) A Drosophila model of combined D-2- and L-2-hydroxyglutaric aciduria reveals a mechanism linking mitochondrial citrate export with oncometabolite accumulation. *Disease models & mechanisms* 11(9):dmm035337.
83. Mizuarai S, Miki S, Araki H, Takahashi K, & Kotani H (2005) Identification of dicarboxylate carrier SLC25A10 as malate transporter in *de novo* fatty acid synthesis. *Journal of Biological Chemistry* 280(37):32434-32441.
84. Li X, et al. (2017) LC-MS-based metabolomics revealed SLC25A22 as an essential regulator of aspartate-derived amino acids and polyamines in KRAS-mutant colorectal cancer. *Oncotarget* 8(60):101333-101344.
85. Toka I, et al. (2010) Mutations in the hyperosmotic stress-responsive mitochondrial BASIC AMINO ACID CARRIER2 enhance proline accumulation in Arabidopsis. *Plant Physiology* 152(4):1851-1862.
86. de Souza Chaves I, et al. (2019) The mitochondrial NAD<sup>+</sup> transporter (NDT1) plays important roles in cellular NAD<sup>+</sup> homeostasis in *Arabidopsis thaliana*. *The Plant Journal* 100(3):487-504.
87. Feitosa-Araujo E, et al. (2020) Down-regulation of a mitochondrial NAD<sup>+</sup> transporter (NDT2) alters seed production and germination in Arabidopsis. *Plant and Cell Physiology*, pcaa017, <https://doi.org/10.1093/pcp/pcaa017>
88. Kleinboelting N, Huep G, Kloetgen A, Viehoveer P, & Weisshaar B (2012) GABI-KAT simplesearch: New features of the *Arabidopsis thaliana* T-DNA mutant database. *Nucleic Acids Research* 40(D1):D1211-D1215.
89. Lu Y, Savage LJ, Larson MD, Wilkerson CG, & Last RL (2011) Chloroplast 2010: A database for large-scale phenotypic screening of Arabidopsis mutants. *Plant Physiology* 155(4):1589-1600.
90. Sweetlove LJ, Taylor NL, & Leaver CJ (2007) Isolation of intact, functional mitochondria from the model plant *Arabidopsis thaliana*. *Mitochondria: Practical protocols*, eds Leister D & Herrmann JM (Humana Press, Totowa, NJ), pp 125-136.
91. Lee CP, Eubel H, & Millar AH (2010) Diurnal changes in mitochondrial function reveal daily optimization of light and dark respiratory metabolism in Arabidopsis. *Molecular & Cellular Proteomics* 9(10):2125-2139.
92. Huang S, Lee CP, & Millar AH (2015) Activity assay for plant mitochondrial enzymes. *Plant mitochondria: Methods and protocols*, eds Whelan J & Murcha MW (Springer New York, New York, NY), pp 139-149.
93. Lee CP, Wirtz M, & Hell R (2014) Evidence for several cysteine transport mechanisms in the mitochondrial membranes of *Arabidopsis thaliana*. *Plant and Cell Physiology* 55(1):64-73.
94. James AM, et al. (2019) The macrocyclizing protease butelase 1 remains autocatalytic and reveals the structural basis for ligase activity. *The Plant Journal* 98(6):988-999.
95. Schwacke R, et al. (2003) ARAMEMNON, a novel database for Arabidopsis integral membrane proteins. *Plant Physiology* 131(1):16-26.

## FIGURE LEGENDS

**Figure 1. Phenotypic characterization of the *DIC2* mutant.** (A) Left, the gene model of *DIC2* showing predicted transmembrane domains based on ARAMEMNON consensus prediction (95), the position of T-DNA insertion in the *dic2-1* line and locations of peptides for LC-MRM-MS (in red lines) and the transcript for qPCR (in green line). Middle, expression levels of *DIC2* as determined by qPCR in different genotypes ( $n = 4$ ). Right, LC-MRM-MS abundance analysis of unique peptides of *DIC2* using the quantifier ion transitions VGPISLGINIVK and NYAGVGDAIR ( $n = 3$ ). Mean  $\pm$  S.E., with asterisks denote significant differences between *mcc-1* vs Col-0 and *mcc-1* vs *mcc-1/gMCC* based on ANOVA and Tukey's post-hoc analysis (\*  $p < 0.05$ ; \*\*  $p < 0.01$ ). (B) Vegetative phenotype of Col-0, *dic2-1* and complemented lines (*gDIC2*, native promoter; *OE*, 35S promoter) grown on soil under short day condition (8 h light/16 h dark) on 35, 42 and 49 days after germination. Representative top view of various genotypes is shown. Expression levels are shown in Table S1.

**Figure 2. Uptake, consumption and export of TCA cycle intermediates by isolated mitochondria.** (A) Experimental design for monitoring substrate consumption, product formation and metabolite transport kinetics of isolated mitochondria. On the left, the mitochondrial TCA cycle and pyruvate metabolising and generating steps are shown, along with the steps that generate reductants for consumption by the ETC and the movements of organic acids across the membranes. Note that the feeding substrate, which is in excess, could cause inhibition of specific steps of the TCA cycle (e.g. feedback inhibition of citrate synthase by citrate). (i) Measurement of oxygen consumption by substrate-fed mitochondria using Clarke-type oxygen electrode is an indirect assay for simultaneously measuring substrate uptake and consumption and subsequent transfer of reductant to the ETC. (ii) In a second approach, mitochondria are fed with a substrate under energised condition. After indicated time interval, mitochondria are separated from extra-mitochondrial space by centrifugation through a silicone oil layer. These fractions are collected, and substrates (S) and products (P) are quantified by SRM-MS. (B) Bar graphs of  $V_{max}$  (upper panel)  $K_m$  (lower panel) for  $O_2$  consumption in the presence of substrate indicated. Mean  $\pm$  S.E. ( $n \geq 5$ ). (C) Time-courses of pyruvate and/or OAA concentrations in extra-mitochondrial space (i-iii) and the matrix (iv-vi) incubated with the indicated feeding substrate. Mean  $\pm$  S.E. ( $n = 4$ ). (D) [ $^{14}C$ ]-malate uptake into isolated mitochondria as a function of time under non-energising conditions. Isolated mitochondria were incubated in minimal transport buffer containing 200  $\mu M$  malate without energising cofactors for the time indicated. Mean  $\pm$  S.E. ( $n = 4$ ). (E) Time-courses of fumarate concentrations in the extra-mitochondrial space (i-iii) and matrix (iv-vi) incubated with the indicated feeding substrate. Mean  $\pm$  S.E. ( $n = 4$ ). (G) Time-courses of citrate concentrations in the extra-mitochondrial space (i-ii) and matrix (iii-iv) incubated with the indicated feeding substrate. Mean  $\pm$  S.E. ( $n = 4$ ). Asterisks denote significant differences between *mcc-1* vs

Col-0 and *mcc-1* vs *mcc-1/gMCC* based on ANOVA and Tukey's post-hoc analysis (\*  $p < 0.05$ ; \*\*  $p < 0.01$ ). Response curves shown in C, E and F can also be found in Fig. S5.

**Figure 3. Photosynthetic and respiratory phenotypes of DIC2 knockout.** (A) Photosynthetic CO<sub>2</sub> assimilation rate at different photosynthetic active radiation (PAR) with CO<sub>2</sub> concentration at 400 p.p.m. and temperature at 22°C ( $n = 6$ , mean  $\pm$  S.E., no significant difference based on one-way ANOVA). (B) Determination of post-illumination CO<sub>2</sub> burst. A single leaf illuminated with actinic light of 1000  $\mu\text{mol m}^{-2} \text{s}^{-1}$ , CO<sub>2</sub> concentration of 100 p.p.m. at 25°C was darkened for two minutes and post-illumination burst was monitored in the first 30 s ( $n = 6$ , mean  $\pm$  S.E., data points within the bracket indicate significant differences of  $p < 0.05$  based on one-way ANOVA Tukey post-hoc test). (C) Cytosolic NAD redox dynamics of 6-week-old leaves in response to a sudden light-to-dark transition. Redox changes of the NAD pool correlate to the Peredox-mCherry ratio ( $\log_{10}(\text{tS/mC})$ ), i.e. high ratio indicates high NADH/NAD<sup>+</sup> ratio. Dark adapted leaf discs were illuminated at actinic light of 220  $\mu\text{mol m}^{-2} \text{s}^{-1}$  according to *SI Methods* before they were transferred to the dark. The 5-min light/15-min dark time course is shown on the left, with the red rectangle indicating the moment when significant differences in NAD redox state were observed. Zoom-in of this red rectangle time interval is shown on the right. Each data point represents mean  $\pm$  S.D. ( $n \geq 6$ ), with asterisks indicate a significant difference with  $p < 0.001$  based on multiple t-tests ( $\alpha = 5\%$ ) from the Holm-Sidak Method. (D) Changes in the cytosolic NAD redox state over 8-h light/16-h dark diurnal cycle. Leaf discs were exposed to actinic light of 120  $\mu\text{mol m}^{-2} \text{s}^{-1}$  before light was switched off. Two independent lines (A and B) for each genotype were measured. Data shown indicate mean  $\pm$  SD ( $n \geq 8$ ) with no significant differences found between lines. (E) Time course of leaf respiration measurements in the dark ( $R_N$ ) as measured by Q2 ( $n > 8$ , mean  $\pm$  S.E., all time points are significantly difference with  $p < 0.05$  based on one-way ANOVA Tukey post-hoc test). Response curves shown in C, E and F can also be found in Fig. S5.

**Figure 4. Quantitative analysis of metabolites associated with the TCA cycle in a diurnal cycle and during prolonged darkness.** (A) Plants were grown under short day conditions for 6 weeks and leaf discs were collected at 1, 4, 8, 12 and 15 hours after dark shift and 1, 4 and 7 hours after light shift. Metabolites in this figure were analysed by LC-MRM-MS. Metabolites are coloured according to their accumulation pattern in *dic2-1* in a diurnal cycle: Orange, accumulates at night; Red, accumulates during light and dark shift; Green, accumulates predominantly during the day; Blue, accumulates throughout a diurnal cycle; Purple, accumulates only after the first hour of dark shift; Grey, metabolite not measured. Each data point represents mean  $\pm$  S.E. ( $n \geq 6$ ), asterisks indicate a significant change as determined by the one-way ANOVA with Tukey post-hoc test (\*  $p < 0.05$ ; \*\*  $p < 0.01$ ). (B) Heat map showing log<sub>2</sub>-fold change, relative to Col-0, of TCA cycle intermediates, selected amino acids and branched chain amino acid derivatives in four-week-old transgenic lines treated with 10 days of prolonged darkness ( $n = 7$ ). BCKAs include: KIV, 2-oxoisovalerate; KIC, 2-oxoisocaproate;

851 KMV, 2-oxo-3-methylvalerate. \*  $p < 0.05$  and \*\*  $p < 0.01$  according to the Student t-test. (C) Changes  
852 in citrate, 2-OG and malate content in Arabidopsis plants after 0, 3, 7, 10 and 12 days of extended  
853 darkness treatment ( $n = 7$ ). Each data point represents mean  $\pm$  S.E. Asterisks indicate a significant  
854 change as determined by one-way ANOVA with Tukey post-hoc test (\*  $p < 0.05$ ; \*\*  $p < 0.01$ ).

855 **Figure 5. The loss of DIC2 causes an altered TCA cycle flux in the dark.** (A) Sucrose levels in  
856 leaf discs from Col-0, *dic2-1* and *dic2-1/gDIC2* collected at different time points of a diurnal cycle (see  
857 Figure 3 legend) as quantitatively determined by GC-MS against authentic standards ( $n = 8$ ). (B)  
858 qPCR analysis showing the expression of SEN1 in plants collected at the end of night (Shaded) or at  
859 the end of day (Light). All expression values were normalised against Col-0 end of day sample ( $n =$   
860 4). (C)  $\text{CO}_2$  evolution of leaf discs incubated in uniformly labelled  $^{14}\text{C}$ -malate (left) and  $^{14}\text{C}$ -leucine  
861 (right) in the dark.  $^{14}\text{CO}_2$  was captured in a NaOH trap, radiolabel in leaf discs was extracted and the  
862 radioactivity in these samples were counted by a liquid scintillation counter. Data shown is the  
863 percentage of  $\text{CO}_2$  released relative to the total amount of radiolabel incorporated into leaf metabolism  
864 ( $n = 3$ ). (D) Schematic representation of all the possible incorporation patterns of isotope-labelled  
865 glucose into the TCA cycle via pyruvate dehydrogenase and/or phosphoenolpyruvate (PEP)-OAA  
866 interconversion in darkened leaf discs. Metabolites that were not measured are grey out. (E-F) Time-  
867 courses of  $^{13}\text{C}$ -labelling into metabolism in darkened leaf discs. Absolute abundance of total labelled  
868 citrate (E, sum of m+2, m+3, m+4, m+5 and m+6), 2-oxoglutarate (F, sum of m+2, m+3, m+4 and  
869 m+5), glutamine (G, sum of m+2, m+3, m+4 and m+5), threonine (H, sum of m+2 and m+4),  
870 asparagine (I, sum of m+2 and m+4) and malate (J, sum of m+2 and m+4) are shown. Means  $\pm$  S.E.  
871 ( $n = 4$ ). Asterisks indicating significant differences (\*  $p < 0.05$ ; \*\*  $p < 0.01$ ) as determined by one-way  
872 ANOVA Tukey post-hoc analysis.

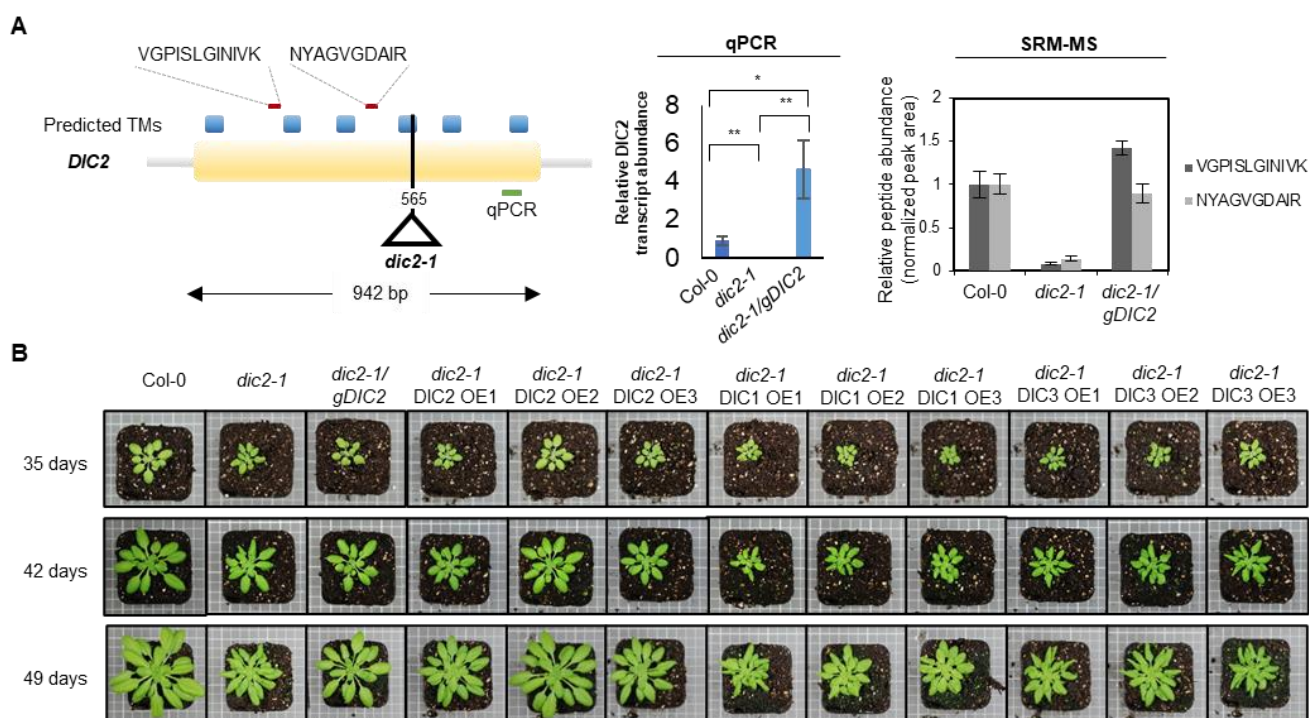

**Figure 1. Phenotypic characterization of the *DIC2* mutant.** (A) Left, the gene model of *DIC2* showing predicted transmembrane domains based on ARAMEMNON consensus prediction (95), the position of T-DNA insertion in the *dic2-1* line and locations of peptides for LC-MRM-MS (in red lines) and the transcript for qPCR (in green line). Middle, expression levels of *DIC2* as determined by qPCR in different genotypes ( $n = 4$ ). Right, LC-MRM-MS abundance analysis of unique peptides of *DIC2* using the quantifier ion transitions VGPISLGINIVK and NYAGVGDAIR ( $n = 3$ ). Mean  $\pm$  S.E., with asterisks denote significant differences between *mcc-1* vs Col-0 and *mcc-1* vs *mcc-1/gMCC* based on ANOVA and Tukey's post-hoc analysis (\*  $p < 0.05$ ; \*\*  $p < 0.01$ ). (B) Vegetative phenotype of Col-0, *dic2-1* and complemented lines (*gDIC2*, native promoter; *OE*, 35S promoter) grown on soil under short day condition (8 h light/16 h dark) on 35, 42 and 49 days after germination. Representative top view of various genotypes is shown. Expression levels are shown in Table S1.



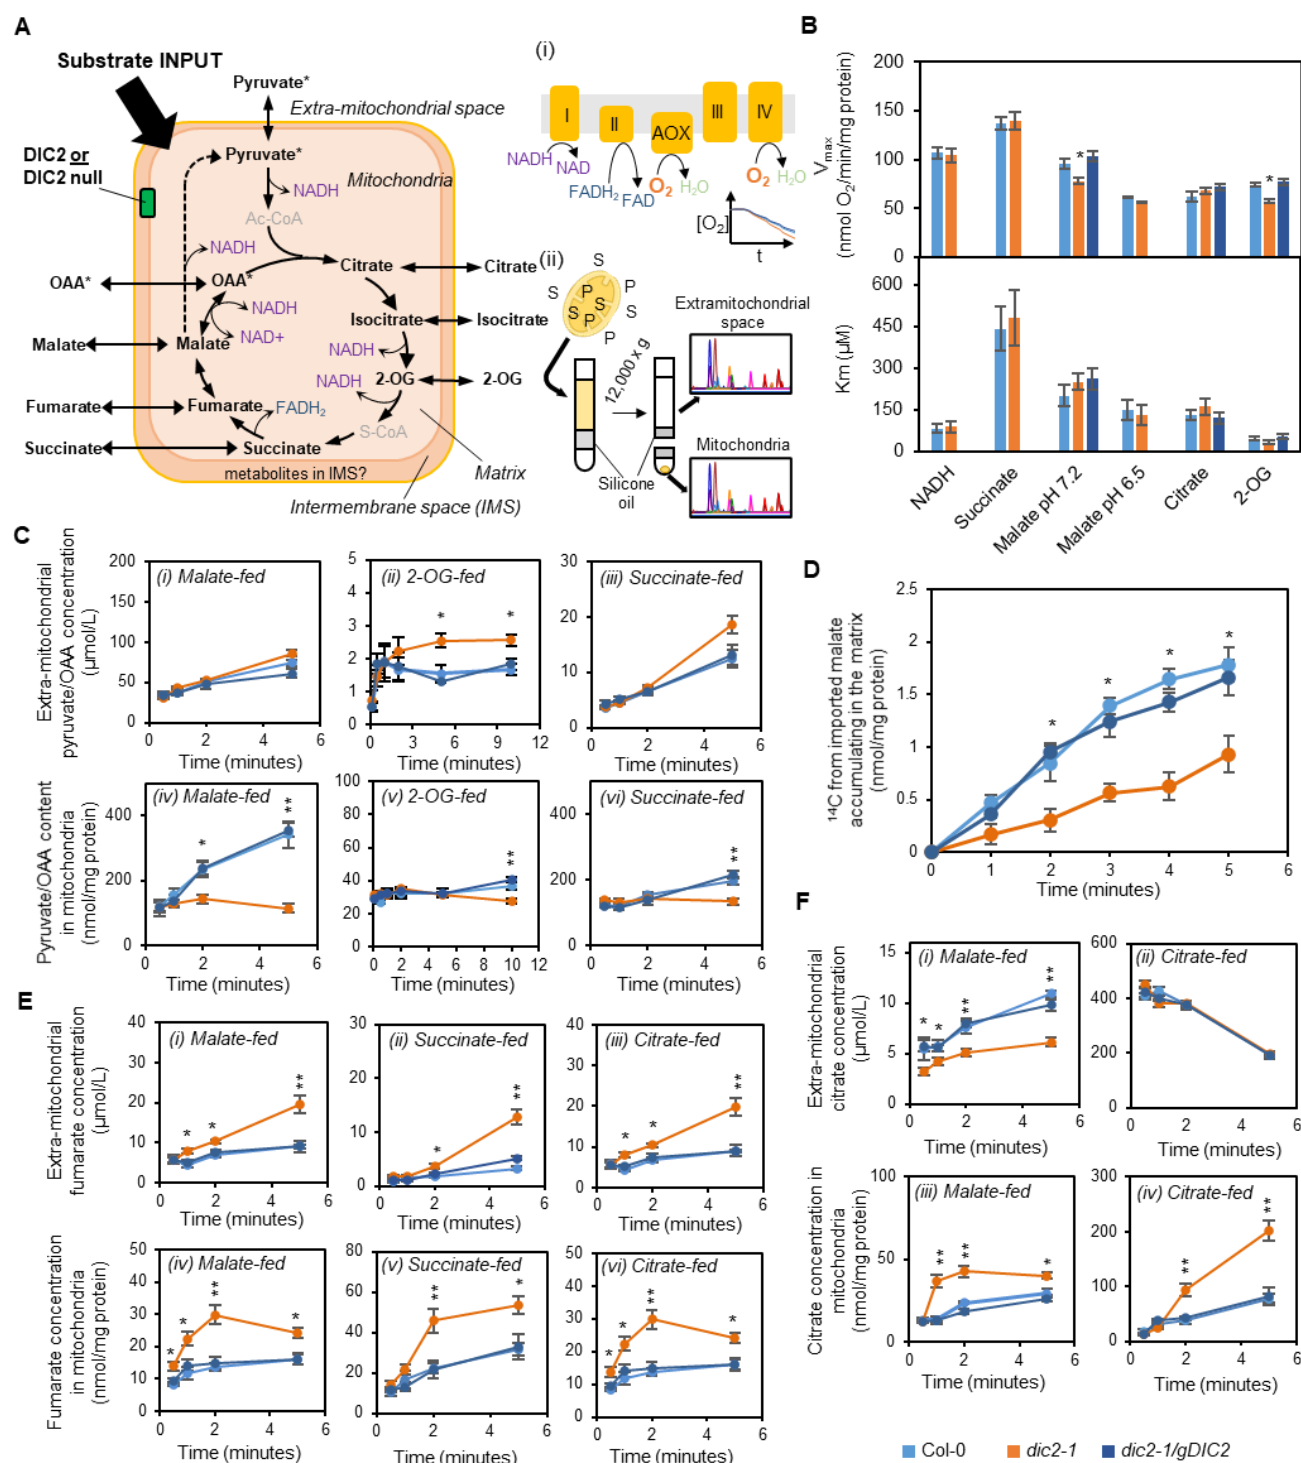

**Figure 2. Uptake, consumption and export of TCA cycle intermediates by isolated mitochondria.** (A) Experimental design for monitoring substrate consumption, product formation and metabolite transport kinetics of isolated mitochondria. On the left, the mitochondrial TCA cycle and pyruvate metabolising and generating steps are shown, along with the steps that generate reductants for consumption by the ETC and the movements of organic acids across the membranes. Note that the feeding substrate, which is in excess, could cause inhibition of specific steps of the TCA cycle (e.g. feedback inhibition of citrate synthase by citrate). (i) Measurement of oxygen consumption by substrate-fed mitochondria using Clarke-type oxygen electrode is an indirect assay for simultaneously measuring substrate uptake and consumption and subsequent transfer of reductant to the ETC. (ii) In a second approach, mitochondria are fed with a substrate under energised condition. After indicated time interval, mitochondria are separated from extra-mitochondrial space by centrifugation through a silicone oil layer. These fractions are collected, and substrates (S) and products (P) are quantified by SRM-MS. (B) Bar graphs of  $V_{max}$  (upper panel)  $K_m$  (lower panel) for O<sub>2</sub> consumption in the presence of substrate indicated. Mean  $\pm$  S.E. ( $n \geq 5$ ). (C) Time-courses of pyruvate and/or OAA concentrations in extra-mitochondrial space (i-iii) and the matrix (iv-vi) incubated with the indicated feeding substrate. Mean  $\pm$  S.E. ( $n = 4$ ). (D) [<sup>14</sup>C]-malate uptake into isolated mitochondria as a function of time



897 under non-energising conditions. Isolated mitochondria were incubated in minimal transport buffer containing 200  $\mu$ M malate  
898 without energising cofactors for the time indicated. Mean  $\pm$  S.E. (n = 4). (E) Time-courses of fumarate concentrations in the  
899 extra-mitochondrial space (i-iii) and matrix (iv-vi) incubated with the indicated feeding substrate. Mean  $\pm$  S.E. (n = 4). (G)  
900 Time-courses of citrate concentrations in the extra-mitochondrial space (i-ii) and matrix (iii-iv) incubated with the indicated  
901 feeding substrate. Mean  $\pm$  S.E. (n = 4). Asterisks denote significant differences between *mcc-1* vs Col-0 and *mcc-1* vs *mcc-*  
902 *1/gMCC* based on ANOVA and Tukey's post-hoc analysis (\* p < 0.05; \*\* p < 0.01). Response curves shown in C, E and F  
903 can also be found in Fig. S5.

904

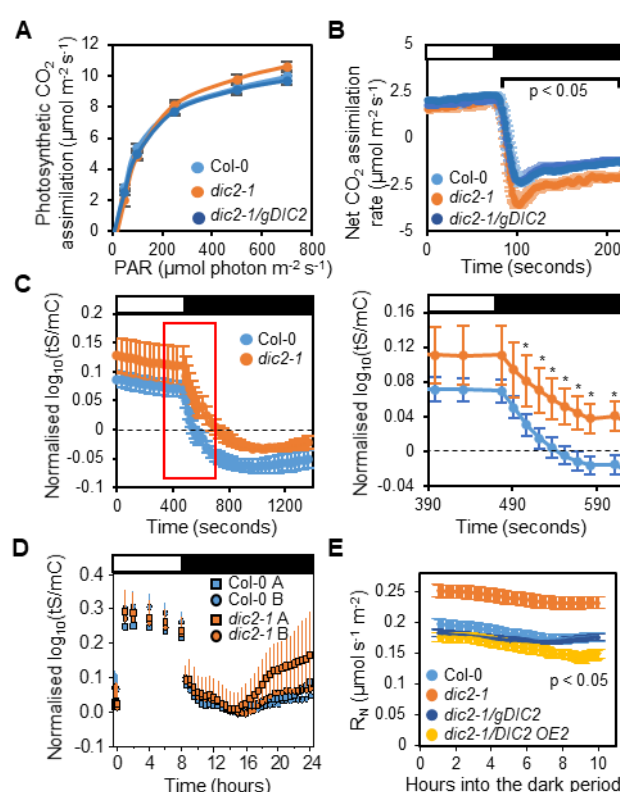

905

**Figure 3. Photosynthetic and respiratory phenotypes of DIC2 knockout.** (A) Photosynthetic CO<sub>2</sub> assimilation rate at different photosynthetic active radiation (PAR) with CO<sub>2</sub> concentration at 400 p.p.m. and temperature at 22°C (n = 6, mean ± S.E., no significant difference based on one-way ANOVA). (B) Determination of post-illumination CO<sub>2</sub> burst. A single leaf illuminated with actinic light of 1000 μmol m<sup>-2</sup> s<sup>-1</sup>, CO<sub>2</sub> concentration of 100 p.p.m. at 25°C was darkened for two minutes and post-illumination burst was monitored in the first 30 s (n = 6, mean ± S.E., data points within the bracket indicate significant differences of p < 0.05 based on one-way ANOVA Tukey post-hoc test). (C) Cytosolic NAD redox dynamics of 6-week-old leaves in response to a sudden light-to-dark transition. Redox changes of the NAD pool correlate to the Peredox-mCherry ratio (log<sub>10</sub>(tS/mC)), i.e. high ratio indicates high NADH/NAD<sup>+</sup> ratio. Dark adapted leaf discs were illuminated at actinic light of 220 μmol m<sup>-2</sup> s<sup>-1</sup> according to *SI Methods* before they were transferred to the dark. The 5-min light/15-min dark time course is shown on the left, with the red rectangle indicating the moment when significant differences in NAD redox state were observed. Zoom-in of this red rectangle time interval is shown on the right. Each data point represents mean ± S.D. (n ≥ 6), with asterisks indicate a significant difference with p < 0.001 based on multiple t-tests (alpha = 5%) from the Holm-Sidak Method. (D) Changes in the cytosolic NAD redox state over 8-h light/16-h dark diurnal cycle. Leaf discs were exposed to actinic light of 120 μmol m<sup>-2</sup> s<sup>-1</sup> before light was switched off. Two independent lines (A and B) for each genotype were measured. Data shown indicate mean ± SD (n ≥ 8) with no significant differences found between lines. (E) Time course of leaf respiration measurements in the dark (R<sub>N</sub>) as measured by Q2 (n > 8, mean ± S.E., all time points are significantly difference with p < 0.05 based on one-way ANOVA Tukey post-hoc test). Response curves shown in C, E and F can also be found in Fig. S5.

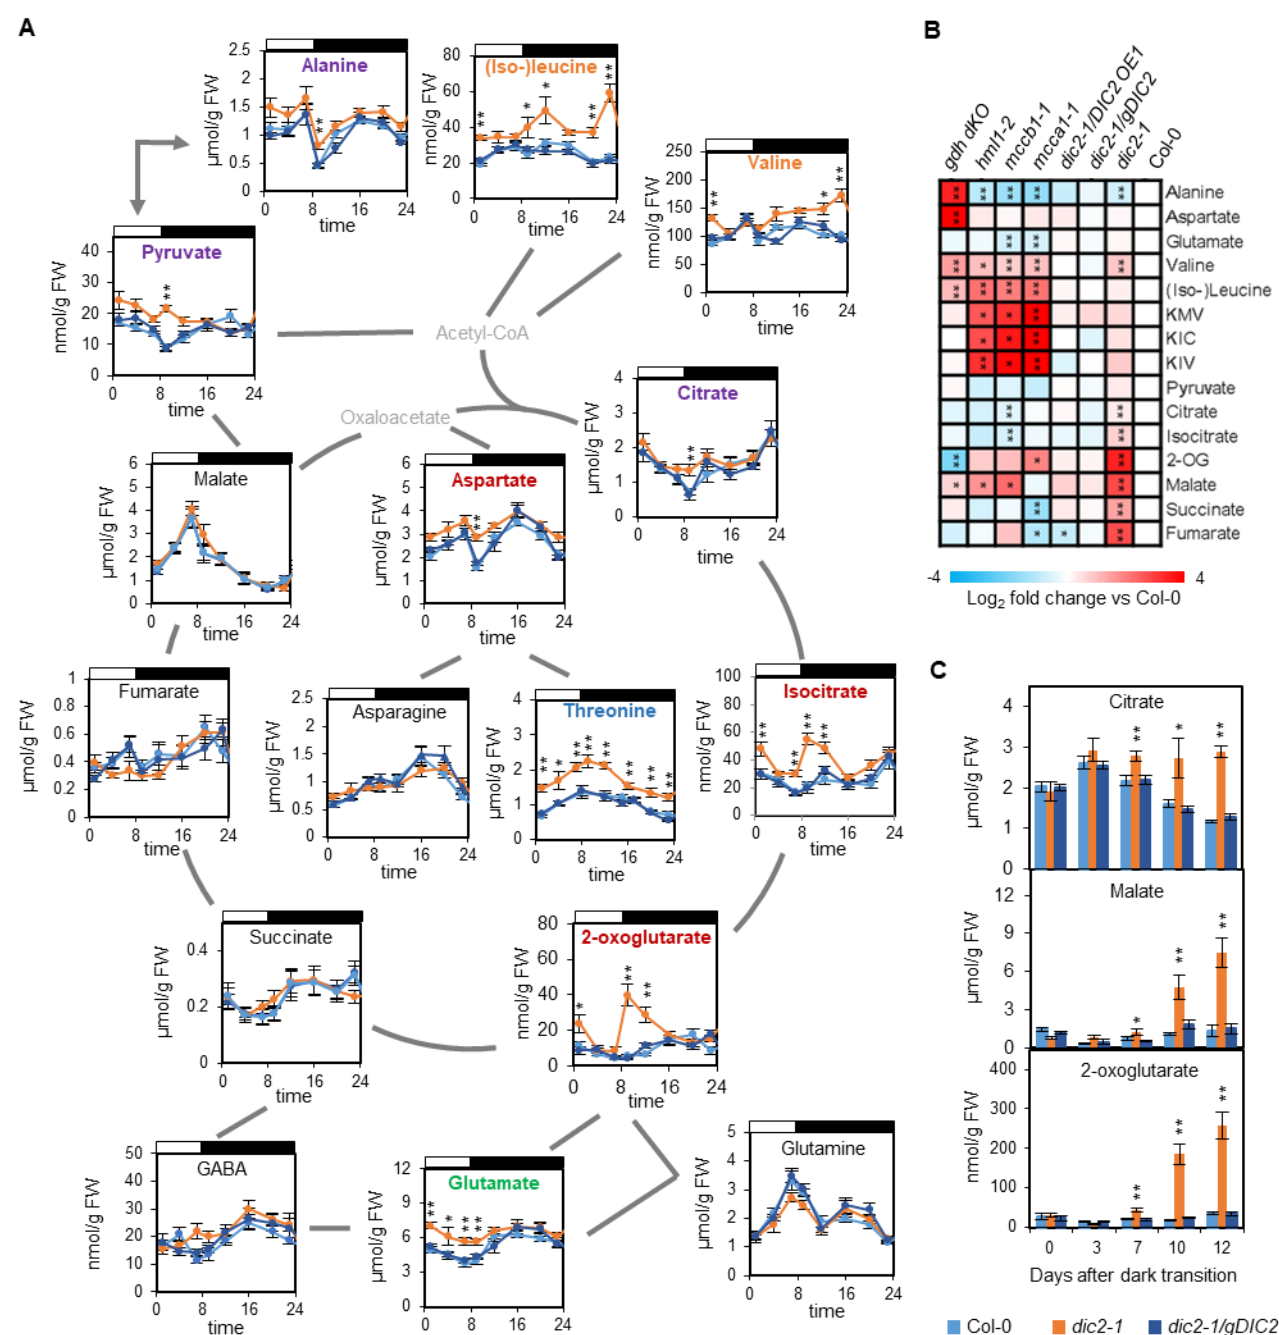

**Figure 4. Quantitative analysis of metabolites associated with the TCA cycle in a diurnal cycle and during prolonged darkness.** (A) Plants were grown under short day conditions for 6 weeks and leaf discs were collected at 1, 4, 8, 12 and 15 hours after dark shift and 1, 4 and 7 hours after light shift. Metabolites in this figure were analysed by LC-MRM-MS. Metabolites are coloured according to their accumulation pattern in *dic2-1* in a diurnal cycle: Orange, accumulates at night; Red, accumulates during light and dark shift; Green, accumulates predominantly during the day; Blue, accumulates throughout a diurnal cycle; Purple, accumulates only after the first hour of dark shift; Grey, metabolite not measured. Each data point represents mean  $\pm$  S.E. ( $n \geq 6$ ), asterisks indicate a significant change as determined by the one-way ANOVA with Tukey post-hoc test (\*  $p < 0.05$ ; \*\*  $p < 0.01$ ). (B) Heat map showing log<sub>2</sub>-fold change, relative to Col-0, of TCA cycle intermediates, selected amino acids and branched chain amino acid derivatives in four-week-old transgenic lines treated with 10 days of prolonged darkness ( $n = 7$ ). BCKAs include: KIV, 2-oxoisovalerate; KIC, 2-oxoisocaproate; KMV, 2-oxo-3-methylvalerate. \*  $p < 0.05$  and \*\*  $p < 0.01$  according to the Student t-test. (C) Changes in citrate, 2-OG and malate content in Arabidopsis plants after 0, 3, 7, 10 and 12 days of extended darkness treatment ( $n = 7$ ). Each data point represents mean  $\pm$  S.E. Asterisks indicate a significant change as determined by one-way ANOVA with Tukey post-hoc test (\*  $p < 0.05$ ; \*\*  $p < 0.01$ ).

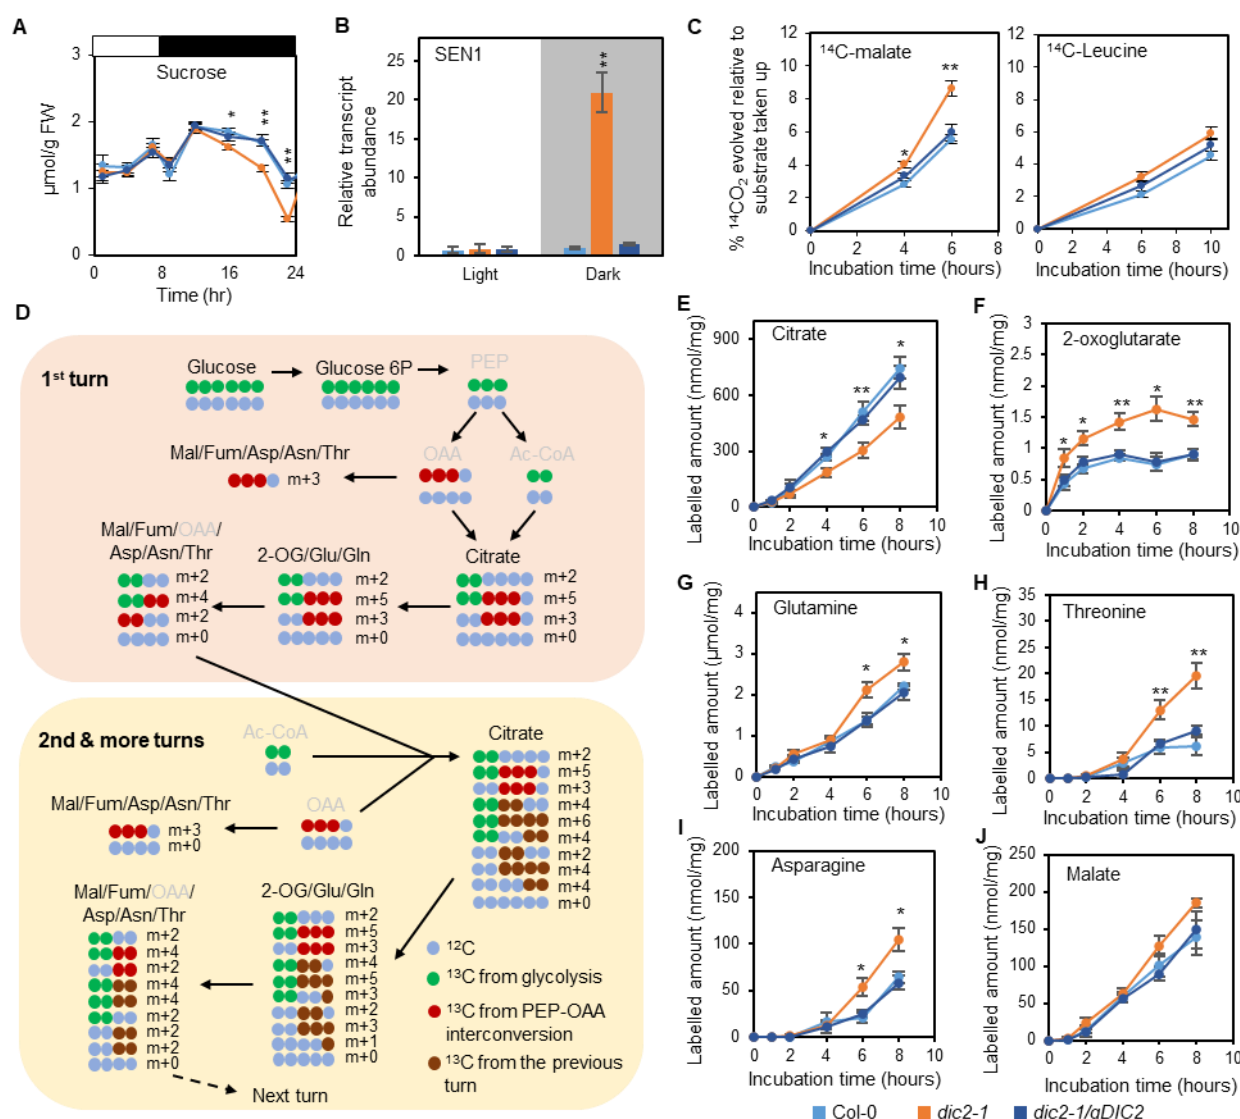

**Figure 5. The loss of DIC2 causes an altered TCA cycle flux in the dark.** (A) Sucrose levels in leaf discs from Col-0, *dic2-1* and *dic2-1/gDIC2* collected at different time points of a diurnal cycle (see Figure 3 legend) as quantitatively determined by GC-MS against authentic standards (n = 8). (B) qPCR analysis showing the expression of SEN1 in plants collected at the end of night (Shaded) or at the end of day (Light). All expression values were normalised against Col-0 end of day sample (n = 4). (C)  $\text{CO}_2$  evolution of leaf discs incubated in uniformly labelled  $^{14}\text{C}$ -malate (left) and  $^{14}\text{C}$ -leucine (right) in the dark.  $^{14}\text{CO}_2$  was captured in a NaOH trap, radiolabel in leaf discs was extracted and the radioactivity in these samples were counted by a liquid scintillation counter. Data shown is the percentage of  $\text{CO}_2$  released relative to the total amount of radiolabel incorporated into leaf metabolism (n = 3). (D) Schematic representation of all the possible incorporation patterns of isotope-labelled glucose into the TCA cycle via pyruvate dehydrogenase and/or phosphoenolpyruvate (PEP)-OAA interconversion in darkened leaf discs. Metabolites that were not measured are greyed out. (E-F) Time-courses of  $^{13}\text{C}$ -labelling into metabolism in darkened leaf discs. Absolute abundance of total labelled citrate (E, sum of m+2, m+3, m+4, m+5 and m+6), 2-oxoglutarate (F, sum of m+2, m+3, m+4 and m+5), glutamine (G, sum of m+2, m+3, m+4 and m+5), threonine (H, sum of m+2 and m+4), asparagine (I, sum of m+2 and m+4) and malate (J, sum of m+2 and m+4) are shown. Means  $\pm$  S.E. (n = 4). Asterisks indicating significant differences (\* p < 0.05; \*\* p < 0.01) as determined by one-way ANOVA Tukey post-hoc analysis.
